# Accurate De Novo Prediction of Protein Contact Map by Ultra-Deep Learning Model

Sheng Wang, Siqi Sun, Zhen Li, Renyu Zhang and Jinbo Xu\*

Toyota Technological Institute at Chicago

[jinboxu@gmail.com](mailto:jinboxu@gmail.com)

\*: corresponding author

The first two authors contribute equally

## Abstract

**Motivation:** Protein contacts contain key information for the understanding of protein structure and function and thus, contact prediction from sequence is an important problem. Recently exciting progress has been made on this problem, but the predicted contacts for proteins without many sequence homologs is still of low quality and not extremely useful for de novo structure prediction.

**Method:** This paper presents a new deep learning method that predicts contacts by integrating both evolutionary coupling (EC) and sequence conservation information through an ultra-deep neural network formed by two deep residual neural networks. The first residual network conducts a series of 1-dimensional convolutional transformation of sequential features; the second residual network conducts a series of 2-dimensional convolutional transformation of pairwise information including output of the first residual network, EC information and pairwise potential. By using very deep residual networks, we can model contact occurring patterns and very complex sequence-structure relationship and thus, obtain high-quality contact prediction regardless of how many sequence homologs are available for proteins in question.

**Results:** Our method greatly outperforms existing methods and leads to much more accurate contact-assisted folding. Tested on 105 CASP11 targets, 76 past CAMEO hard targets, and 398 membrane proteins, the average top L long-range prediction accuracy obtained our method, one representative EC method CCMpred and the CASP11 winner MetaPSICOV is 0.47, 0.21 and 0.30, respectively; the average top L/10 long-range accuracy of our method, CCMpred and MetaPSICOV is 0.77, 0.47 and 0.59, respectively. Ab initio folding using our predicted contacts as restraints **but without any force fields** can yield correct folds (i.e., TMscore>0.6) for 203 of the 579 test proteins, while that using MetaPSICOV- and CCMpred-predicted contacts can do so for only 79 and 62 of them, respectively. Our contact-assisted models also have much better quality than template-based models especially for membrane proteins. The 3D models built from our contact prediction have TMscore>0.5 for 208 of the 398 membrane proteins, while those from homology modeling have TMscore>0.5 for only 10 of them. Further, even if trained by only non-membrane proteins, our deep learning method

35 works very well on membrane protein contact prediction. In the recent blind CAMEO benchmark, our  
36 fully-automated web server implementing this method successfully folded 4 targets with a new fold and  
37 only 0.3L-2.3L effective sequence homologs, including one  $\beta$  protein of 182 residues, one  $\alpha+\beta$  protein  
38 of 125 residues, one  $\alpha$  protein of 140 residues and one  $\alpha$  protein of 217 residues.

39 **Availability:** <http://raptorx.uchicago.edu/ContactMap/>

## 40 Author Summary

41 Protein contact prediction from sequence alone is an important problem. Recently exciting progress has  
42 been made on this problem due to the development of direct evolutionary coupling analysis (DCA).  
43 However, DCA is effective on only some proteins with a very large number (>1000) of sequence  
44 homologs. To further improve contact prediction, we borrow ideas from the latest breakthrough of deep  
45 learning, a powerful machine learning technique that has recently revolutionized object recognition,  
46 speech recognition and the GO game. We have developed a new deep learning method that predicts  
47 contacts by integrating both sequence conservation and co-variation information through an ultra-deep  
48 neural network, which can model very complex relationship between sequence and contact map as well  
49 as high-order correlation among residues.

50 Our test results suggest that deep learning can revolutionize protein contact prediction. Tested on 398  
51 membrane proteins, the L/10 long-range accuracy obtained by our method is 77.6% while that by the  
52 state-of-the-art methods CCMpred and MetaPSICOV is 51.8% and 61.2%, respectively. Ab initio  
53 folding using our predicted contacts as restraints can generate much better 3D structural models than  
54 the other contact prediction methods. In particular, without using any force fields our predicted contacts  
55 yield correct folds for 203 of the 579 test proteins, while MetaPSICOV- and CCMpred can do so for  
56 only 79 and 62 of them, respectively. Our contact-assisted models also have much better quality than  
57 template-based models (TBM) built from the training proteins. For example, our contact-assisted  
58 models have TMscore>0.5 for 208 of the 398 membrane proteins while TBMs have TMscore >0.5 for  
59 only 10 of them. Even without using any membrane proteins to train our deep learning models, our  
60 method still performs very well on membrane protein contact prediction. Recent blind test of our  
61 method in CAMEO shows that our method successfully folded 4 targets with a new fold and only  
62 0.3L-2.3L effective sequence homologs.

## 63 Introduction

64 De novo protein structure prediction from sequence alone is one of most challenging problems in  
65 computational biology. Recent progress has indicated that some correctly-predicted long-range contacts  
66 may allow accurate topology-level structure modeling (1) and that direct evolutionary coupling  
67 analysis (DCA) of multiple sequence alignment (MSA) may reveal some long-range native contacts for  
68 proteins and protein-protein interactions with a large number of sequence homologs (2, 3). Therefore,  
69 contact prediction and contact-assisted protein folding has recently gained much attention in the  
70 community. However, for many proteins especially those without many sequence homologs, the  
71 predicted contacts by the state-of-the-art predictors such as CCMpred (4), PSICOV (5), Evfold (6),

72 plmDCA(7), Gremlin(8), MetaPSICOV (9) and CoinDCA (10) are still of low quality and insufficient  
73 for accurate contact-assisted protein folding (11); (12). This motivates us to develop a better contact  
74 prediction method, especially for proteins without a large number of sequence homologs. In this paper  
75 we define that two residues form a contact if they are spatially proximal in the native structure, i.e., the  
76 Euclidean distance of their  $C_{\beta}$  atoms less than  $8\text{\AA}$  (13).

77 Existing contact prediction methods roughly belong to two categories: evolutionary coupling analysis  
78 (ECA) and supervised machine learning. ECA predicts contacts by identifying co-evolved residues in a  
79 protein, such as EVfold (6), PSICOV (5), CCMpred (4), Gremlin (8), plmDCA and others (14-16).  
80 However, DCA usually needs a large number of sequence homologs to be effective (10, 17).  
81 Supervised machine learning predicts contacts from a variety of information, e.g., SVMSEQ (18),  
82 CMAPpro (13), PconsC2 (17), MetaPSICOV (9), PhyCMAP (19) and CoinDCA-NN (10). Meanwhile,  
83 PconsC2 uses a 5-layer supervised learning architecture (17); CoinDCA-NN and MetaPSICOV employ  
84 a 2-layer neural network (9). CMAPpro uses a neural network with more layers, but its performance  
85 saturates at about 10 layers. Some supervised methods such as MetaPSICOV and CoinDCA-NN  
86 outperform ECA on proteins without many sequence homologs, but their performance is still limited by  
87 their shallow architectures.

88 To further improve supervised learning methods for contact prediction, we borrow ideas from very  
89 recent breakthrough in computer vision. In particular, we have greatly improved contact prediction by  
90 developing a brand-new deep learning model called residual neural network (20) for contact prediction.  
91 Deep learning is a powerful machine learning technique that has revolutionized image classification  
92 (21, 22) and speech recognition (23). In 2015, ultra-deep residual neural networks (24) demonstrated  
93 superior performance in several computer vision challenges (similar to CASP) such as image  
94 classification and object recognition (25). If we treat a protein contact map as an image, then protein  
95 contact prediction is kind of similar to (but not exactly same as) pixel-level image labeling, so some  
96 techniques effective for image labeling may also work for contact prediction. However, there are some  
97 important differences between image labeling and contact prediction. First, in computer vision  
98 community, image-level labeling (i.e., classification of a single image) has been extensively studied,  
99 but there are much fewer studies on pixel-level image labeling (i.e., classification of an individual  
100 pixel). Second, in many image classification scenarios, image size is resized to a fixed value, but we  
101 cannot resize a contact map since we need to do prediction for every residue pair (equivalent to an  
102 image pixel). Third, contact prediction has much more complex input features (including both  
103 sequential and pairwise features) than image labeling. Fourth, the ratio of contacts in a protein is very  
104 small (<2%). That is, the number of positive and negative labels in contact prediction is extremely  
105 unbalanced.

106 In this paper we present a very deep residual neural network for contact prediction. Such a network can  
107 capture very complex sequence-contact relationship and high-order contact correlation in a protein. We  
108 train this deep neural network using a subset of proteins with solved structures and then test its  
109 performance on public data including the CASP (26, 27) and CAMEO (28) targets as well as  
110 membrane proteins. Our experimental results show that our method yields much better accuracy than

111 existing methods and also result in much more accurate contact-assisted 3D structure modeling. The  
 112 deep learning method described here will also be useful for the prediction of protein-protein and  
 113 protein-RNA interfacial contacts.

## 114 Results

### 115 Deep learning model for contact prediction

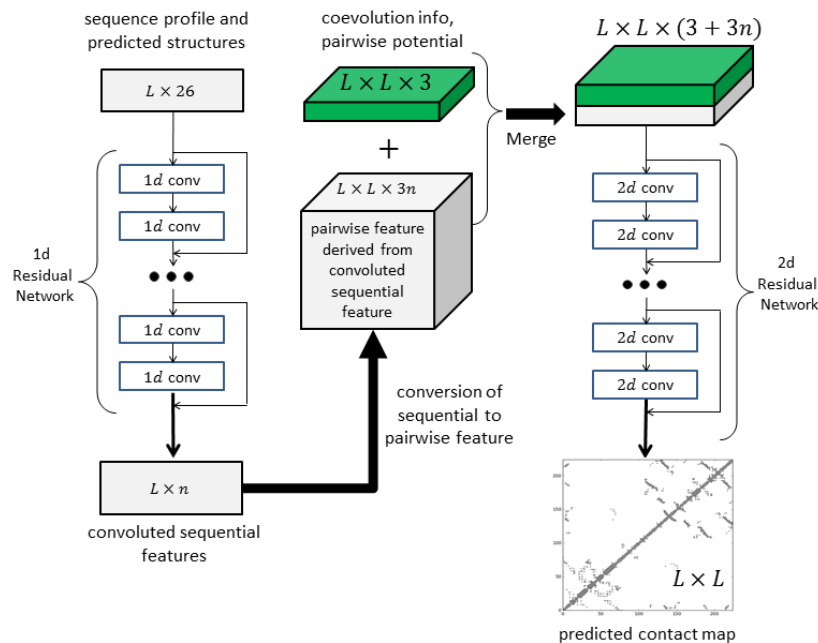

116

117 **Figure 1.** Illustration of our deep learning model for contact prediction. Meanwhile,  $L$  is the sequence  
 118 length of one protein under prediction.

119 Figure 1 illustrates our deep neural network model for contact prediction (29). Different from previous  
 120 supervised learning approaches(9, 13) for contact prediction that employ only a small number of  
 121 hidden layers (i.e., a shallow architecture), our deep neural network employs dozens of hidden layers.  
 122 By using a very deep architecture, our model can automatically learn the complex relationship between  
 123 sequence information and contacts and also implicitly model the interdependency among contacts and  
 124 thus, improve contact prediction (17). Our model consists of two major modules, each being a residual  
 125 neural network. The first module conducts a series of 1-dimensional (1D) convolutional  
 126 transformations of sequential features (sequence profile, predicted secondary structure and solvent  
 127 accessibility). The output of this 1D convolutional network is converted to a 2-dimensional (2D) matrix  
 128 by an operation similar to outer product and then fed into the 2<sup>nd</sup> module together with pairwise  
 129 features (i.e., co-evolution information, pairwise contact and distance potential). The 2<sup>nd</sup> module is a  
 130 2D residual network that conducts a series of 2D convolutional transformations of its input. Finally,  
 131 the output of the 2D convolutional network is fed into a logistic regression, which predicts the probability  
 132 of any two residues form a contact. In addition, each convolutional layer is also preceded by a simple  
 133 nonlinear transformation called rectified linear unit (30). **Mathematically, the output of 1D residual  
 134 network is just a 2D matrix with dimension  $L \times m$  where  $m$  is the number of new features (or hidden**

135 neurons) generated by the last convolutional layer of the network. Biologically, this 1D residual  
 136 network learns the sequential context of a residue. By stacking multiple convolution layers, the  
 137 network can learn information in a very large sequential context. The output of a 2D convolutional  
 138 layer has dimension  $L \times L \times n$  where  $n$  is the number of new features (or hidden neurons) generated by  
 139 this layer for one residue pair. The 2D residual network mainly learns contact occurring patterns or  
 140 high-order residue correlation (i.e., 2D context of a residue pair). The number of hidden neurons may  
 141 vary at each layer.

142 Our test data includes the 150 Pfam families described in (5), 105 CASP11 test proteins (31), 398  
 143 membrane proteins (Supplementary Table 1) and 76 CAMEO hard targets released from 10/17/2015 to  
 144 04/09/2016 (Supplementary Table 2). The tested methods include PSICOV (5), Evfold (6), CCMpred  
 145 (4), plmDCA(7), Gremlin(8), and MetaPSICOV (9). The former 5 methods conducts pure DCA while  
 146 MetaPSICOV (9) is a supervised learning method that performed the best in CASP11 (31). All the  
 147 programs are run with parameters set according to their respective papers. We cannot evaluate PconsC2  
 148 (17) since we failed to obtain any results from its web server. PconsC2 did not outperform  
 149 MetaPSICOV in CASP11 (31), so it may suffice to just compare our method with MetaPSICOV.

## 150 Overall Performance

151 We evaluate the accuracy of the top  $L/k$  ( $k=10, 5, 2, 1$ ) predicted contacts where  $L$  is protein sequence  
 152 length (10). We define that a contact is short-, medium- and long-range when the sequence distance of  
 153 the two residues in a contact falls into  $[6, 11]$ ,  $[12, 23]$ , and  $\geq 24$ , respectively. The prediction  
 154 accuracy is defined as the percentage of native contacts among the top  $L/k$  predicted contacts. When a  
 155 protein has no  $L/k$  native (short- or medium-range) contacts, we replace the denominator by  $L/k$   
 156 in calculating accuracy. This may make the short- and medium-range accuracy look small although it is  
 157 easier to predict short- and medium-range contacts than long-range contacts.

158 **Table 1.** Contact prediction accuracy on the 150 Pfam families.

| Method     | Short |      |      |      | Medium |      |      |      | Long |      |      |      |
|------------|-------|------|------|------|--------|------|------|------|------|------|------|------|
|            | L/10  | L/5  | L/2  | L    | L/10   | L/5  | L/2  | L    | L/10 | L/5  | L/2  | L    |
| EVfold     | 0.50  | 0.40 | 0.26 | 0.17 | 0.64   | 0.52 | 0.34 | 0.22 | 0.74 | 0.68 | 0.53 | 0.39 |
| PSICOV     | 0.58  | 0.43 | 0.26 | 0.17 | 0.65   | 0.51 | 0.32 | 0.20 | 0.77 | 0.70 | 0.52 | 0.37 |
| CCMpred    | 0.65  | 0.50 | 0.29 | 0.19 | 0.73   | 0.60 | 0.37 | 0.23 | 0.82 | 0.76 | 0.62 | 0.45 |
| plmDCA     | 0.66  | 0.50 | 0.29 | 0.19 | 0.72   | 0.60 | 0.36 | 0.22 | 0.81 | 0.76 | 0.61 | 0.44 |
| Gremlin    | 0.66  | 0.51 | 0.30 | 0.19 | 0.74   | 0.60 | 0.37 | 0.23 | 0.82 | 0.76 | 0.63 | 0.46 |
| MetaPSICOV | 0.82  | 0.70 | 0.45 | 0.27 | 0.83   | 0.73 | 0.52 | 0.33 | 0.92 | 0.87 | 0.74 | 0.58 |
| Our method | 0.93  | 0.81 | 0.51 | 0.30 | 0.93   | 0.86 | 0.62 | 0.38 | 0.98 | 0.96 | 0.89 | 0.74 |

159

160 **Table 2.** Contact prediction accuracy on 105 CASP11 test proteins.

| Method | Short |     |     |   | Medium |     |     |   | Long |     |     |   |
|--------|-------|-----|-----|---|--------|-----|-----|---|------|-----|-----|---|
|        | L/10  | L/5 | L/2 | L | L/10   | L/5 | L/2 | L | L/10 | L/5 | L/2 | L |

|            |      |      |      |      |      |      |      |      |      |      |      |      |
|------------|------|------|------|------|------|------|------|------|------|------|------|------|
| EVfold     | 0.25 | 0.21 | 0.15 | 0.12 | 0.33 | 0.27 | 0.19 | 0.13 | 0.37 | 0.33 | 0.25 | 0.19 |
| PSICOV     | 0.29 | 0.23 | 0.15 | 0.12 | 0.34 | 0.27 | 0.18 | 0.13 | 0.38 | 0.33 | 0.25 | 0.19 |
| CCMpred    | 0.35 | 0.28 | 0.17 | 0.12 | 0.40 | 0.32 | 0.21 | 0.14 | 0.43 | 0.39 | 0.31 | 0.23 |
| plmDCA     | 0.32 | 0.26 | 0.17 | 0.12 | 0.39 | 0.31 | 0.21 | 0.14 | 0.42 | 0.38 | 0.30 | 0.23 |
| Gremlin    | 0.35 | 0.27 | 0.17 | 0.12 | 0.40 | 0.31 | 0.21 | 0.14 | 0.44 | 0.40 | 0.31 | 0.23 |
| MetaPSICOV | 0.69 | 0.58 | 0.39 | 0.25 | 0.69 | 0.59 | 0.42 | 0.28 | 0.60 | 0.54 | 0.45 | 0.35 |
| Our method | 0.82 | 0.70 | 0.46 | 0.28 | 0.85 | 0.76 | 0.55 | 0.35 | 0.81 | 0.77 | 0.68 | 0.55 |

161

162

**Table 3.** Contact prediction accuracy on 76 past CAMEO hard targets.

| Method     | Short |      |      |      | Medium |      |      |      | Long |      |      |      |
|------------|-------|------|------|------|--------|------|------|------|------|------|------|------|
|            | L/10  | L/5  | L/2  | L    | L/10   | L/5  | L/2  | L    | L/10 | L/5  | L/2  | L    |
| EVfold     | 0.17  | 0.13 | 0.11 | 0.09 | 0.23   | 0.19 | 0.13 | 0.10 | 0.25 | 0.22 | 0.17 | 0.13 |
| PSICOV     | 0.20  | 0.15 | 0.11 | 0.08 | 0.24   | 0.19 | 0.13 | 0.09 | 0.25 | 0.23 | 0.18 | 0.13 |
| CCMpred    | 0.22  | 0.16 | 0.11 | 0.09 | 0.27   | 0.22 | 0.14 | 0.10 | 0.30 | 0.26 | 0.20 | 0.15 |
| plmDCA     | 0.23  | 0.18 | 0.12 | 0.09 | 0.27   | 0.22 | 0.14 | 0.10 | 0.30 | 0.26 | 0.20 | 0.15 |
| Gremlin    | 0.21  | 0.17 | 0.11 | 0.08 | 0.27   | 0.22 | 0.14 | 0.10 | 0.31 | 0.26 | 0.20 | 0.15 |
| MetaPSICOV | 0.56  | 0.47 | 0.31 | 0.20 | 0.53   | 0.45 | 0.32 | 0.22 | 0.47 | 0.42 | 0.33 | 0.25 |
| Our method | 0.67  | 0.57 | 0.37 | 0.23 | 0.69   | 0.61 | 0.42 | 0.28 | 0.69 | 0.65 | 0.55 | 0.42 |

163

164

**Table 4.** Contact prediction accuracy on 398 membrane proteins.

| Method     | Short |      |      |      | Medium |      |      |      | Long |      |      |      |
|------------|-------|------|------|------|--------|------|------|------|------|------|------|------|
|            | L/10  | L/5  | L/2  | L    | L/10   | L/5  | L/2  | L    | L/10 | L/5  | L/2  | L    |
| EVfold     | 0.16  | 0.13 | 0.09 | 0.07 | 0.28   | 0.22 | 0.13 | 0.09 | 0.44 | 0.37 | 0.26 | 0.18 |
| PSICOV     | 0.22  | 0.16 | 0.10 | 0.07 | 0.29   | 0.21 | 0.13 | 0.09 | 0.42 | 0.34 | 0.23 | 0.16 |
| CCMpred    | 0.27  | 0.19 | 0.11 | 0.08 | 0.36   | 0.26 | 0.15 | 0.10 | 0.52 | 0.45 | 0.31 | 0.21 |
| plmDCA     | 0.26  | 0.18 | 0.11 | 0.08 | 0.35   | 0.25 | 0.14 | 0.09 | 0.51 | 0.42 | 0.29 | 0.20 |
| Gremlin    | 0.27  | 0.19 | 0.11 | 0.07 | 0.37   | 0.26 | 0.15 | 0.10 | 0.52 | 0.45 | 0.32 | 0.21 |
| MetaPSICOV | 0.45  | 0.35 | 0.22 | 0.14 | 0.49   | 0.40 | 0.27 | 0.18 | 0.61 | 0.55 | 0.42 | 0.30 |
| Our method | 0.60  | 0.46 | 0.27 | 0.16 | 0.66   | 0.53 | 0.33 | 0.22 | 0.78 | 0.73 | 0.62 | 0.47 |

165

166 As shown in Tables 1-4, our method outperforms all tested DCA methods and MetaPSICOV by a very  
 167 large margin on the 4 test sets regardless of how many top predicted contacts are evaluated and no  
 168 matter whether the contacts are short-, medium- or long-range. These results also show that two  
 169 supervised learning methods greatly outperform the pure DCA methods and the three  
 170 pseudo-likelihood DCA methods plmDCA, Gremlin and CCMpred perform similarly, but outperform  
 171 PSICOV (Gaussian model) and Evfold (maximum-entropy method). The advantage of our method is

172 the smallest on the 150 Pfam families because many of them have a pretty large number of sequence  
 173 homologs. In terms of top L long-range contact accuracy on the CASP11 set, our method exceeds  
 174 CCMpred and MetaPSICOV by 0.32 and 0.20, respectively. On the 76 CAMEO hard targets, our  
 175 method exceeds CCMpred and MetaPSICOV by 0.27 and 0.17, respectively. On the 398 membrane  
 176 protein set, our method exceeds CCMpred and MetaPSICOV by 0.26 and 0.17, respectively. Our  
 177 method uses a subset of protein features used by MetaPSICOV, but performs much better than  
 178 MetaPSICOV due to our deep architecture and that we predict contacts of a protein simultaneously.  
 179 Since the Pfam set is relatively easy, we will not present its result any more in the following sections.

## 180 Prediction accuracy with respect to the number of sequence homologs

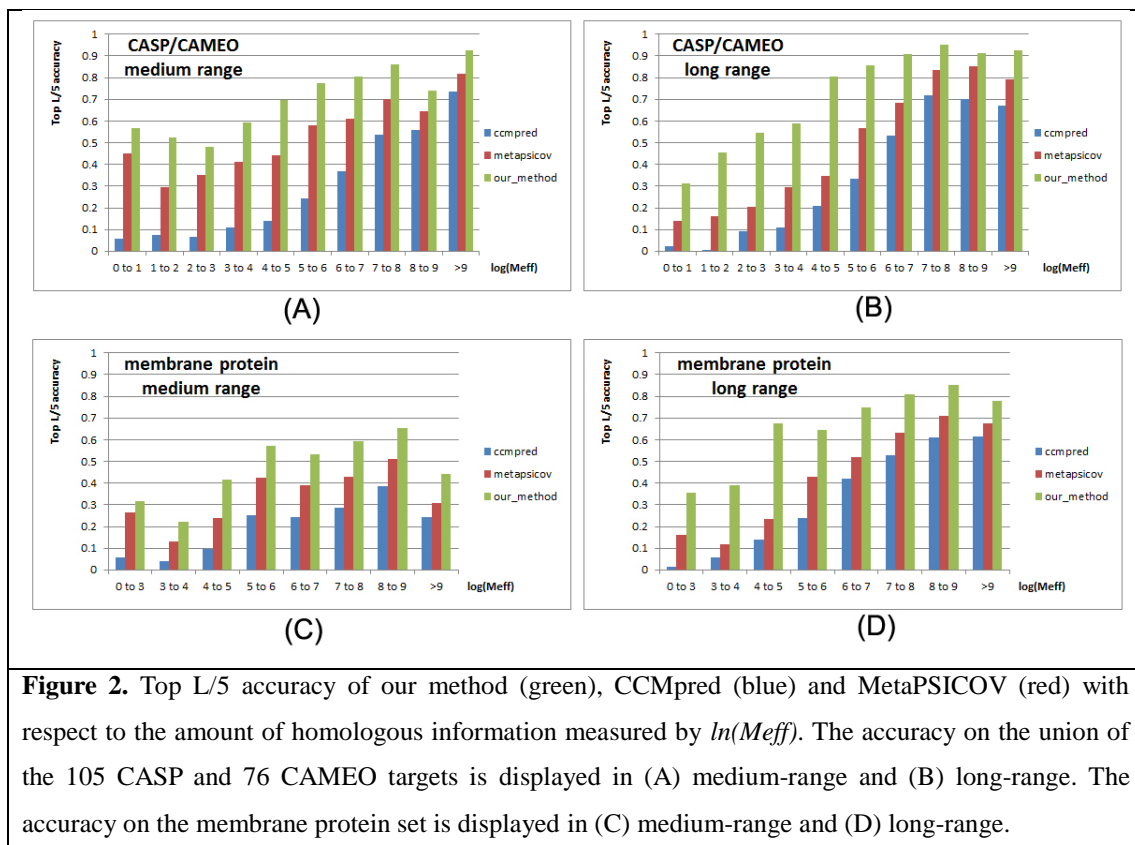

181 To examine the performance of our method with respect to the amount of homologous information  
 182 available for a protein under prediction, we measure the effective number of sequence homologs in  
 183 multiple sequence alignment (MSA) by  $Meff$  (19) (see Method for its formula). A protein with a smaller  
 184  $Meff$  has fewer non-redundant sequence homologs (70% sequence identity is used as cutoff). We divide  
 185 all the test proteins into 10 bins according to  $\ln(Meff)$  and then calculate the average accuracy of the  
 186 test proteins in each bin. We merge the first 3 bins for the membrane protein set since they contain a  
 187 small number of proteins.

188 Fig. 2 shows that the top L/5 contact prediction accuracy increases with respect to  $Meff$ , i.e., the  
 189 number of effective sequence homologs, and that our method outperforms both MetaPSICOV and  
 190 CCMpred regardless of  $Meff$ . Our long-range prediction accuracy is even better when  $\ln(Meff) \leq 7$   
 191 (equivalently  $Meff < 1100$ ), i.e., when the protein under prediction does not have a very large number of

192 non-redundant sequence homologs. Our method has a large advantage over the other methods even  
193 when  $M_{eff}$  is very big (>8000). This indicates that our method indeed benefits from some extra  
194 information such as inter-contact correlation or high-order residue correlation.

### 195 Contact-assisted protein folding

196 One of the important goals of contact prediction is to perform contact-assisted protein folding (11). To  
197 test if our contact prediction can lead to better 3D structure modeling than the others, we build structure  
198 models for all the test proteins using the top predicted contacts as restraints of ab initio folding. For  
199 each test protein, we feed the top predicted contacts as restraints into the CNS suite (32) to generate 3D  
200 models. We measure the quality of a 3D model by TMscore (33), which ranges from 0 to 1, with 0  
201 indicating the worst and 1 the best, respectively.

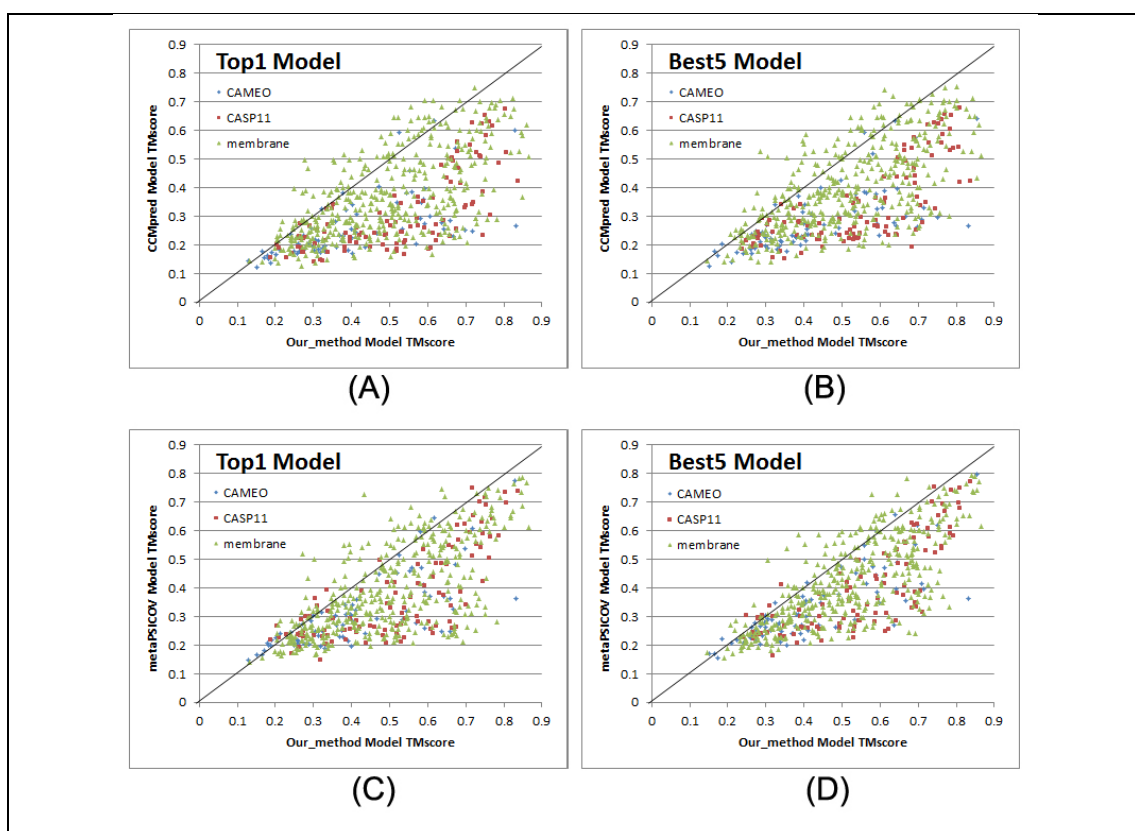

**Figure 3.** Quality comparison (measured by TMscore) of contact-assisted models generated by our method, CCMpred and MetaPSICOV on the 105 CASP11 targets (red square), 76 CAMEO targets (blue diamond) and 398 membrane protein targets (green triangle), respectively. (A) and (B): comparison of top 1 and the best of top 5 models between our method (X-axis) and CCMpred (Y-axis). (C) and (D): comparison of top 1 and the best of top 5 models between our method (X-axis) and MetaPSICOV (Y-axis).

202 As shown in Fig. 3, our predicted contacts can generate much better 3D models than CCMpred and  
203 MetaPSICOV. On average, the 3D models generated by our method are better than MetaPSICOV and  
204 CCMpred by ~0.12 TMscore unit and ~0.15 unit, respectively. The average TMscore of the top 1  
205 models generated by CCMpred, MetaPSICOV, and our method is 0.333, 0.377, and 0.518, respectively



206 on the CASP dataset. On the 76 CAMEO targets, the average TMscore of the top 1 models generated by  
207 CCMpred, MetaPSICOV and our method is 0.256, 0.305 and 0.407, respectively. On the membrane  
208 protein set, the average TMscore of the top 1 models generated by CCMpred, MetaPSICOV and our  
209 method is 0.354, 0.387, and 0.493, respectively. On the CASP set, the average TMscore of the best of  
210 top 5 models generated by CCMpred, MetaPSICOV, and our method is 0.352, 0.399, and 0.543,  
211 respectively. On the 76 CAMEO proteins, the average TMscore of the best of top 5 models generated  
212 by CCMpred, MetaPSICOV, and our method is 0.271, 0.334, and 0.431, respectively. On the  
213 membrane protein set, the average TMscore of the best of top 5 models generated by CCMpred,  
214 MetaPSICOV, and our method is 0.385, 0.417, and 0.516, respectively. In particular, when the best of  
215 top 5 models are considered, our predicted contacts can result in correct folds (i.e., TMscore>0.6) for  
216 203 of the 579 test proteins, while MetaPSICOV- and CCMpred-predicted contacts can do so for only  
217 79 and 62 of them, respectively.

218 Our method also generates much better contact-assisted models for the test proteins without many  
219 non-redundant sequence homologs. When the 219 of 579 test proteins with  $M_{eff} \leq 500$  are evaluated, the  
220 average TMscore of the top 1 models generated by our predicted contacts for the CASP11, CAMEO  
221 and membrane sets is 0.426, 0.365, and 0.397, respectively. By contrast, the average TMscore of the  
222 top 1 models generated by CCMpred-predicted contacts for the CASP11, CAMEO and membrane sets  
223 is 0.236, 0.214, and 0.241, respectively. The average TMscore of the top 1 models generated by  
224 MetaPSICOV-predicted contacts for the CASP11, CAMEO and membrane sets is 0.292, 0.272, and  
225 0.274, respectively.

## 226 **Contact-assisted models vs. template-based models**

227 To compare the quality of our contact-assisted models and template-based models (TBMs), we built  
228 TBMs for all the test proteins using our training proteins as candidate templates. To generate TBMs for  
229 a test protein, we first run HHblits (with the UniProt20\_2016 library) to generate an HMM file for the  
230 test protein, then run HHsearch with this HMM file to search for the best templates among the 6767  
231 training proteins, and finally run MODELLER to build a TBM from each of the top 5 templates. Fig. 4  
232 shows the head-to-head comparison between our contact-assisted models and the TBMs on these three  
233 test sets. When only the first models are evaluated, our contact-assisted models for the 76 CAMEO test  
234 proteins have an average TMscore 0.407 while the TBMs have an average TMscore 0.317. On the 105  
235 CASP11 test proteins, the average TMscore of our contact-assisted models is 0.518 while that of the  
236 TBMs is only 0.393. On the 398 membrane proteins, the average TMscore of our contact-assisted  
237 models is 0.493 while that of the TBMs is only 0.149. When the best of top 5 models are evaluated, on  
238 the 76 CAMEO test proteins, the average TMscore of our contact-assisted models is 0.431 while that of  
239 the TBMs is only 0.366. On the 105 CASP11 test proteins, the average TMscore of our contact-assisted  
240 models is 0.543 while that of the TBMs is only 0.441. On the 398 membrane proteins, the average  
241 TMscore of our contact-assisted models is 0.516 while that of the TBMs is only 0.187. The low quality  
242 of TBMs further confirms that there is not much redundancy between our training and test proteins.

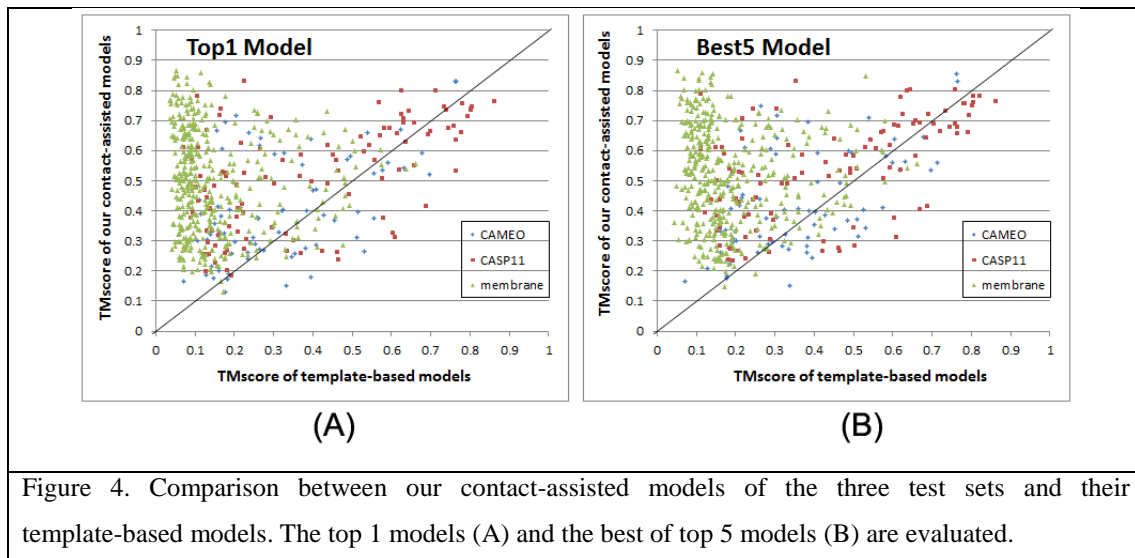

243

244 Further, when the best of top 5 models are considered for all the methods, our contact-assisted models  
245 have TMscore>0.5 for 24 of the 76 CAMEO targets while TBMs have TMscore>0.5 for only 18 of  
246 them. Our contact-assisted models have TMscore >0.5 for 67 of the 105 CASP11 targets while TBMs  
247 have TMscore>0.5 for only 44 of them. Our contact-assisted models have TMscore>0.5 for 208 of the  
248 398 membrane proteins while TBMs have TMscore >0.5 for only 10 of them. Our contact-assisted  
249 models for membrane proteins are much better than their TBMs because the similarity between the  
250 6767 training proteins and the 398 test membrane proteins is small. When the 219 test proteins with  
251  $\leq 500$  non-redundant sequence homologs are evaluated, the average TMscore of the TBMs is 0.254  
252 while that of our contact-assisted models is 0.421. Among these 219 proteins, our contact-assisted  
253 models have TMscore>0.5 for 72 of them while TBMs have TMscore>0.5 for only 17 of them.

254 The above results imply that 1) when a query protein has no close templates, our contact-assisted  
255 modeling may work better than template-based modeling; 2) contact-assisted modeling shall be  
256 particularly useful for membrane proteins; and 3) our deep learning model does not predict contacts by  
257 simply copying contacts from the training proteins since our predicted contacts may result in much  
258 better 3D models than homology modeling.

### 259 **Blind test in CAMEO**

260 We have implemented our algorithm as a contact prediction web server  
261 (<http://raptorx.uchicago.edu/ContactMap/>) and in September 2016 started to blindly test it through the  
262 weekly live benchmark CAMEO (<http://www.cameo3d.org/>). CAMEO is operated by the Schwede  
263 group, with whom we have never collaborated. CAMEO can be interpreted as a fully-automated CASP,  
264 but has a smaller number (>20) of participating servers since many CASP-participating servers are not  
265 fully automated and thus, cannot handle the large number of test targets used by CAMEO. Nevertheless,  
266 the CAMEO participants include some well-known servers such as Robetta(34), Phyre(35),  
267 RaptorX(36), Swiss-Model(37) and HHpred(38). Meanwhile Robetta employs both ab initio folding  
268 and template-based modeling while the latter four employ mainly template-based modeling. Every

269 weekend CAMEO sends test sequences to participating servers for prediction and then evaluates 3D  
 270 models collected from servers. The test proteins used by CAMEO have no publicly available native  
 271 structures until CAMEO finishes collecting models from participating servers.

272 During the past 2 months (9/3/2016 to 10/31/2016), CAMEO in total released 41 hard targets  
 273 (Supplementary Table 3). Although classified as hard by CAMEO, some of them may have  
 274 distantly-related templates. Table 5 lists the contact prediction accuracy of our server in the blind  
 275 CAMEO test as compared to the other methods. Again, our method outperforms the others by a very  
 276 large margin no matter how many contacts are evaluated. The CAMEO evaluation of our  
 277 contact-assisted 3D models is available at the CAMEO web site. You will need to register CAMEO in  
 278 order to see all the detailed results of our contact server (ID: server60). Although our server currently  
 279 build 3D models using only 2L-3L predicted contacts without any force fields and fragment assembly  
 280 procedures, our server predicts 3D models with TMscore>0.5 for 28 of the 41 targets and TMscore>0.6  
 281 for 16 of them. The average TMscore of the best of top 5 models built from the contacts predicted by  
 282 our server, CCMpred and MetaPSICOV is 0.535, 0.316 and 0.392, respectively. See Fig. 5 for the  
 283 detailed comparison of the 3D models generated by our server, CCMpred and MetaPSICOV. Our  
 284 server has also successfully folded 4 targets with a new fold. See Table 6 for a summary of our  
 285 prediction results of these 4 targets and the below subsections for a detailed analysis.

286 **Table 5.** Contact prediction accuracy on 41 recent CAMEO hard targets.

| Method     | Short |      |      |      | Medium |      |      |      | Long |      |      |      |
|------------|-------|------|------|------|--------|------|------|------|------|------|------|------|
|            | L/10  | L/5  | L/2  | L    | L/10   | L/5  | L/2  | L    | L/10 | L/5  | L/2  | L    |
| EVfold     | 0.20  | 0.15 | 0.11 | 0.08 | 0.25   | 0.19 | 0.12 | 0.09 | 0.33 | 0.29 | 0.21 | 0.15 |
| PSICOV     | 0.21  | 0.16 | 0.11 | 0.08 | 0.26   | 0.20 | 0.11 | 0.08 | 0.33 | 0.30 | 0.21 | 0.15 |
| plmDCA     | 0.26  | 0.19 | 0.12 | 0.09 | 0.28   | 0.23 | 0.13 | 0.09 | 0.38 | 0.33 | 0.24 | 0.17 |
| Gremlin    | 0.25  | 0.18 | 0.12 | 0.08 | 0.29   | 0.22 | 0.13 | 0.09 | 0.37 | 0.34 | 0.25 | 0.17 |
| CCMpred    | 0.24  | 0.18 | 0.12 | 0.08 | 0.29   | 0.22 | 0.13 | 0.09 | 0.37 | 0.34 | 0.24 | 0.17 |
| MetaPSICOV | 0.53  | 0.43 | 0.27 | 0.17 | 0.51   | 0.42 | 0.28 | 0.19 | 0.60 | 0.54 | 0.40 | 0.30 |
| Our server | 0.67  | 0.52 | 0.32 | 0.20 | 0.68   | 0.58 | 0.38 | 0.24 | 0.82 | 0.75 | 0.62 | 0.46 |

287

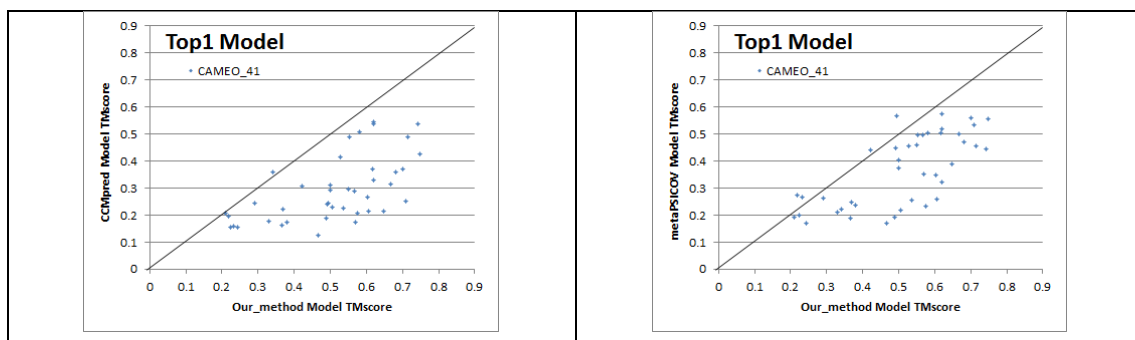

| (A)                                                                                                                                                                                                                                         | (B) |
|---------------------------------------------------------------------------------------------------------------------------------------------------------------------------------------------------------------------------------------------|-----|
| Figure 5. Quality comparison (measured by TMscore) of contact-assisted models generated by our server, CCMpred and MetaPSICOV on the 41 CAMEO hard targets. (A) our server (X-axis) vs. CCMpred and (B) our server (X-axis) vs. MetaPSICOV. |     |

288

289 Table 6. A summary of our blind prediction results on 4 CAMEO hard targets with a new fold.

| Target | CAMEO ID              | Type           | Len | Meff | Method             | RMSD(Å) | TMscore |
|--------|-----------------------|----------------|-----|------|--------------------|---------|---------|
| 2nc8A  | 2016-09-10_00000002_1 | $\beta$        | 182 | 250  | Our server         | 6.5     | 0.61    |
|        |                       |                |     |      | Best of the others | 12.18   | 0.47    |
| 5dcjA  | 2016-09-17_00000018_1 | $\alpha+\beta$ | 125 | 180  | Our server         | 7.9     | 0.52    |
|        |                       |                |     |      | Best of the others | 10.0    | 0.53    |
| 5djeB  | 2016-09-24_00000052_1 | $\alpha$       | 140 | 330  | Our server         | 5.81    | 0.65    |
|        |                       |                |     |      | Best of the others | 14.98   | 0.34    |
| 5f5pH  | 2016-10-15_00000047_1 | $\alpha$       | 217 | 65   | Our server         | 4.21    | 0.71    |
|        |                       |                |     |      | Best of the others | >40.0   | 0.48    |

290

291 Among these 41 hard targets, there are five multi-domain proteins: 5idoA, 5hmqF, 5b86B, 5b2gG and  
 292 5cylH. Table 7 shows that the average contact prediction accuracy of our method on these 5  
 293 multi-domain proteins is much better than the others. For multi-domain proteins, we use a  
 294 superposition-independent score IDDT instead of TMscore to measure the quality of a 3D model. As  
 295 shown in Table 8, the 3D models built by our server from predicted contacts have much better IDDT  
 296 score than those built from CCMpred and MetaPSICOV.

297 Table 7. The average contact prediction accuracy of our method and the others on 5 multi-domain  
 298 proteins among the 41 CAMEO hard targets.

| Method     | Short |      |      |      | Medium |      |      |      | Long |      |      |      |
|------------|-------|------|------|------|--------|------|------|------|------|------|------|------|
|            | L/10  | L/5  | L/2  | L    | L/10   | L/5  | L/2  | L    | L/10 | L/5  | L/2  | L    |
| EVfold     | 0.17  | 0.13 | 0.09 | 0.07 | 0.18   | 0.12 | 0.08 | 0.06 | 0.54 | 0.40 | 0.26 | 0.18 |
| PSICOV     | 0.27  | 0.18 | 0.10 | 0.07 | 0.26   | 0.17 | 0.11 | 0.07 | 0.62 | 0.49 | 0.31 | 0.20 |
| plmDCA     | 0.29  | 0.23 | 0.11 | 0.07 | 0.32   | 0.22 | 0.11 | 0.08 | 0.66 | 0.51 | 0.34 | 0.22 |
| Gremlin    | 0.30  | 0.24 | 0.12 | 0.08 | 0.32   | 0.22 | 0.12 | 0.07 | 0.67 | 0.52 | 0.36 | 0.23 |
| CCMpred    | 0.30  | 0.23 | 0.12 | 0.08 | 0.32   | 0.22 | 0.12 | 0.08 | 0.66 | 0.51 | 0.35 | 0.23 |
| MetaPSICOV | 0.52  | 0.37 | 0.21 | 0.14 | 0.32   | 0.26 | 0.16 | 0.11 | 0.72 | 0.58 | 0.41 | 0.26 |
| Our method | 0.74  | 0.58 | 0.33 | 0.19 | 0.68   | 0.55 | 0.33 | 0.20 | 0.96 | 0.91 | 0.76 | 0.57 |

299

300 Table 8. The IDDT score of the 3D models built for the 5 multi-domain proteins using predicted  
 301 contacts.

| Targets | Length | CCMpred | MetaPSICOV | Our   |
|---------|--------|---------|------------|-------|
| 5idoA   | 512    | 21.96   | 24.24      | 36.83 |
| 5hmqF   | 637    | 21.55   | 25.91      | 33.16 |
| 5b86B   | 600    | 28.49   | 32.85      | 42.58 |
| 5b2gG   | 364    | 22.38   | 30.47      | 47.91 |
| 5cylH   | 370    | 20.79   | 23.37      | 30.62 |

302 **Study of CAMEO target 2nc8A (CAMEO ID: 2016-09-10\_0000002\_1, PDB ID:2nc8)**

303 On September 10, 2016, CAMEO released two hard test targets for structure prediction. Our contact  
 304 server successfully folded the hardest one (PDB ID: 2nc8), a mainly-beta protein of 182 residues. Table  
 305 9 shows that our server produced a much better contact prediction than CCMpred and MetaPSICOV.  
 306 CCMpred has very low accuracy since HHblits detected only ~250 non-redundant sequence homologs  
 307 for this protein, i.e., its Meff=250. Fig. 6 shows the predicted contact maps and their overlap with the  
 308 native. MetaPSICOV fails to predict many long-range contacts while CCMpred introduces too many  
 309 false positives.

310 Table 9. The long- and medium-range contact prediction accuracy of our method, MetaPSICOV and  
 311 CCMpred on the CAMEO target 2nc8A.

|            | Long-range accuracy |       |       |       | Medium-range accuracy |       |       |       |
|------------|---------------------|-------|-------|-------|-----------------------|-------|-------|-------|
|            | L                   | L/2   | L/5   | L/10  | L                     | L/2   | L/5   | L/10  |
| Our method | 0.764               | 0.923 | 0.972 | 1.0   | 0.450                 | 0.769 | 0.972 | 1.0   |
| MetaPSICOV | 0.258               | 0.374 | 0.556 | 0.667 | 0.390                 | 0.626 | 0.806 | 0.944 |
| CCMpred    | 0.165               | 0.231 | 0.389 | 0.333 | 0.148                 | 0.187 | 0.167 | 0.222 |

312

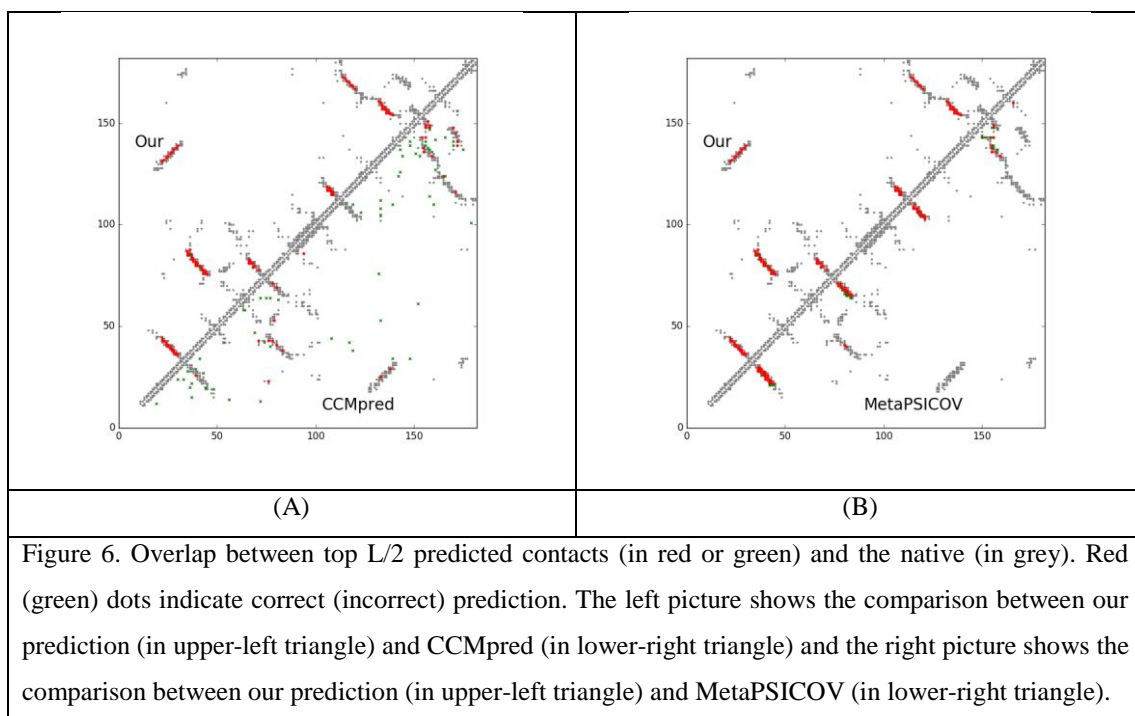

313

314 The 3D model submitted by our contact server has TMscore 0.570 (As of September 16, 2016, our  
 315 server submits only one 3D model for each test protein) and the best of our top 5 models has TMscore  
 316 0.612 and RMSD 6.5Å. Fig. 7 shows that the beta strands of our predicted model (red) matches well  
 317 with the native (blue). To examine the superimposition of our model with its native structure from  
 318 various angles, please see <http://raptorx.uchicago.edu/DeepAlign/75097011/>. By contrast, the best of  
 319 top 5 models built by CNS from CCMpred- and MetaPSICOV-predicted contacts have TMscore 0.206  
 320 and 0.307, respectively, and RMSD 15.8Å and 14.2Å, respectively. The best TMscore obtained by the  
 321 other CAMEO-participating servers is only 0.47 (Fig. 8). Three top-notch servers HHpred, RaptorX  
 322 and Robetta only submitted models with TMscore $\leq$ 0.30. According to Xu and Zhang (39), a 3D  
 323 model with TMscore $<$ 0.5 is unlikely to have a correct fold  
 324 while a model with TMscore $\geq$ 0.6 surely has a correct fold.  
 325 That is, our contact server predicted a correct fold for this test  
 326 protein while the others failed to.

327 This test protein represents almost a novel fold. Our in-house  
 328 structural homolog search tool DeepSearch(40) cannot identify  
 329 structurally very similar proteins in PDB70 (created right  
 330 before September 10, 2016) for this test protein. PDB70 is a  
 331 set of representative structures derived from clustering all the  
 332 proteins in PDB by 70% sequence identity. Two weakly  
 333 similar proteins are 4kx7A and 4g2aA, which have TMscore  
 334 0.521 and 0.535 with the native structure of the test protein,

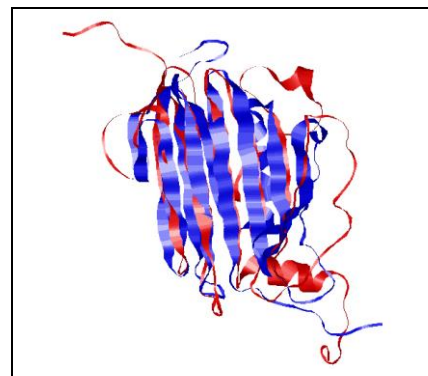

Figure 7. Superimposition between our predicted model (red) and its native structure (blue) for the CAMEO test protein (PDB ID 2nc8 and chain A).

335 respectively, and TMscore 0.465 and 0.466 with our best model, respectively. This is consistent with  
 336 the fact that none of the template-based servers in CAMEO submitted a model with TMscore $>$ 0.5. We  
 337 cannot find structurally similar proteins in PDB70 for our best model either; the best TMscore between  
 338 PDB70 and our best model is only 0.480. That is, the models predicted by our method are not simply  
 339 copied from the solved structures in PDB, and our method can indeed fold a relatively large beta  
 340 protein with a novel fold.

| Server Name        | Predictions | Resp. time (hh:mm:ss) | From | To  | Cov (%) | IDDT  | IDDT-Cu | Avg. IDDT-BS | Avg. IDDT-BS details | QScore | QScore details | CAD-Score | GDT_HA | RMSD  | GDC   | Model Conf. | MaxSub | TMscore |
|--------------------|-------------|-----------------------|------|-----|---------|-------|---------|--------------|----------------------|--------|----------------|-----------|--------|-------|-------|-------------|--------|---------|
| Server 60          | Model 1     | 00:51:19              | 1    | 182 | 100     | 42.76 | 50.39   | -            | -                    | -      | -              | 0.48      | 26.46  | 7.69  | 36.04 | 0.50        | 0.37   | 0.57    |
| Server 56          | Model 1     | 20:53:42              | 1    | 182 | 100     | 35.81 | 43.06   | -            | -                    | -      | -              | 0.43      | 19.88  | 12.18 | 27.65 | 0.80        | 0.28   | 0.47    |
| Server 58          | Model 1     | 20:54:33              | 1    | 182 | 100     | 35.81 | 43.06   | -            | -                    | -      | -              | 0.43      | 19.88  | 12.18 | 27.65 | 0.80        | 0.28   | 0.47    |
| RaptorX            | Model 1     | 01:17:35              | 1    | 182 | 100     | 28.73 | 32.74   | -            | -                    | -      | -              | 0.41      | 12.57  | 17.55 | 16.32 | 0.65        | 0.16   | 0.30    |
| Server 57          | Model 1     | 20:54:44              | 1    | 182 | 100     | 28.64 | 33.07   | -            | -                    | -      | -              | 0.39      | 12.43  | 13.54 | 18.68 | 0.73        | 0.17   | 0.36    |
| Server 45          | Model 1     | 01:51:45              | 1    | 182 | 100     | 28.45 | 32.88   | -            | -                    | -      | -              | 0.43      | 19.01  | 21.83 | 22.86 | 0.65        | 0.23   | 0.36    |
| Robetta            | Model 1     | 51:20:57              | 10   | 182 | 95      | 28.33 | 32.62   | -            | -                    | -      | -              | 0.45      | 10.23  | 25.10 | 11.51 | 0.50        | 0.12   | 0.21    |
| HHpredB            | Model 1     | 12:14:59              | 1    | 182 | 100     | 23.70 | 28.37   | -            | -                    | -      | -              | 0.40      | 12.87  | 20.72 | 16.16 | 0.85        | 0.17   | 0.30    |
| Princeton_TEMPLATE | Model 1     | 01:02:52              | 1    | 182 | 100     | 23.38 | 27.09   | -            | -                    | -      | -              | 0.38      | 9.94   | 23.55 | 11.52 | 0.59        | 0.12   | 0.24    |
| SPARKS-X           | Model 1     | 00:12:47              | 1    | 182 | 100     | 23.08 | 26.26   | -            | -                    | -      | -              | 0.37      | 7.60   | 19.12 | 8.89  | 0.52        | 0.09   | 0.20    |
| Server 55          | Model 1     | 00:28:24              | 1    | 182 | 100     | 22.38 | 25.78   | -            | -                    | -      | -              | 0.39      | 7.60   | 23.65 | 7.81  | 0.67        | 0.08   | 0.20    |
| RBO Aleph          | Model 1     | 65:29:29              | 1    | 182 | 100     | 21.52 | 23.78   | -            | -                    | -      | -              | 0.35      | 5.99   | 20.90 | 6.86  | 0.80        | 0.07   | 0.17    |

341

342 Figure 8. The list of CAMEO-participating servers (only 12 of 20 are displayed) and their

343 model scores. The rightmost column displays the TMscore of submitted models. Server60 is our  
 344 contact web server.

345 **Study of CAMEO target 5dcjA (CAMEO ID: 2016-09-17\_00000018\_1, PDB ID:5dcj)**

346 On September 17, 2016, our contact web server successfully folded one of the hard CAMEO targets  
 347 (PDB ID: 5dcj). This target is an alpha+beta sandwich protein of 125 residues. The four beta sheets of  
 348 this protein are wrapped by one and three alpha helixes at two sides. Table 10 shows that our server  
 349 produced a much better contact prediction than CCMpred and MetaPSICOV. Specifically, the contact  
 350 map predicted by our method has L/2 long-range accuracy 0.645 while that by CCMpred and  
 351 MetaPSICOV has L/2 accuracy only 0.05 and 0.194, respectively. CCMpred has very low accuracy  
 352 since HHblits can only find ~180 non-redundant sequence homologs for this protein, i.e., its Meff=180.  
 353 Fig. 9 shows the predicted contact maps and their overlap with the native. Both CCMpred and  
 354 metaPSICOV failed to predict some long-range contacts.

355 **Table 10.** The long- and medium-range contact prediction accuracy of our method, MetaPSICOV and  
 356 CCMpred on the CAMEO target 5dcjA.

|            | Long range |       |      |       | Medium range |       |      |      |
|------------|------------|-------|------|-------|--------------|-------|------|------|
|            | L          | L/2   | L/5  | L/10  | L            | L/2   | L/5  | L/10 |
| Our method | 0.456      | 0.645 | 0.88 | 0.833 | 0.36         | 0.645 | 0.92 | 1.0  |
| metaPSICOV | 0.144      | 0.194 | 0.32 | 0.25  | 0.344        | 0.532 | 0.8  | 1.0  |
| CCMpred    | 0.05       | 0.05  | 0.08 | 0.08  | 0.1          | 0.129 | 0.12 | 0.25 |

357

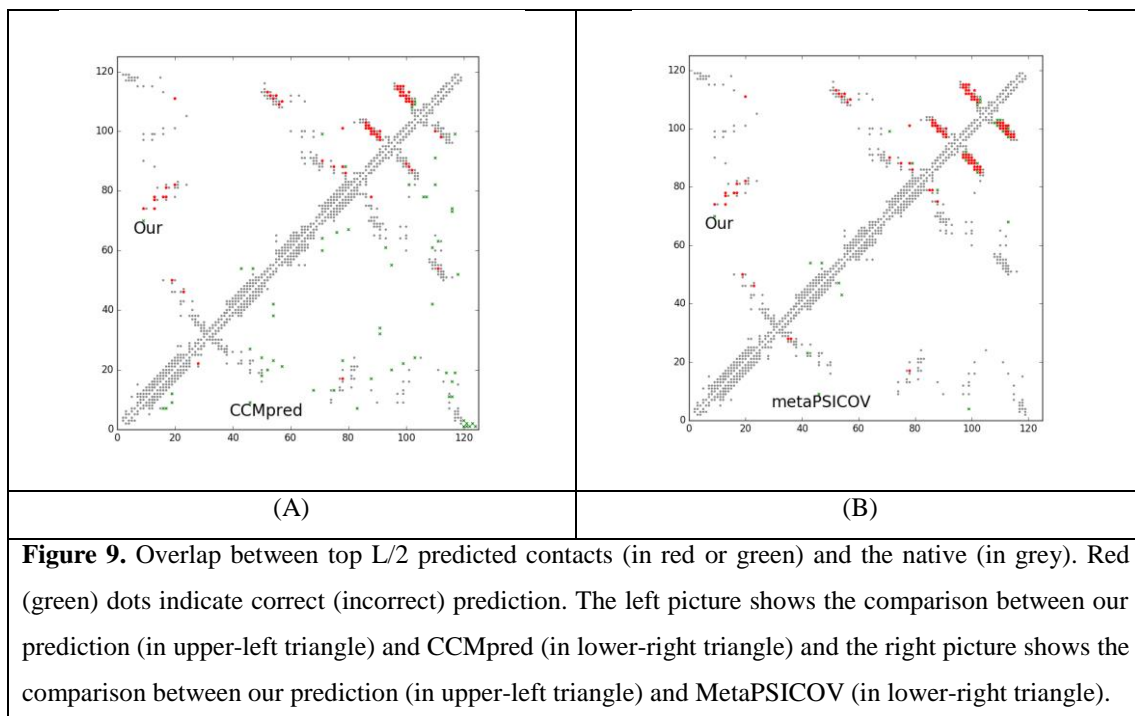

358

359 The first 3D model submitted by our contact server has TMscore 0.50 and the best of our 5 models has

360 TMscore 0.52 and RMSD 7.9Å. The best of top 5 models built by CNS from CCMpred- and  
361 MetaPSICOV-predicted contacts have TMscore 0.243 and 0.361, respectively. Fig. 10(A) shows that  
362 all the beta strands and the three surrounding alpha helices of our predicted model (in red) matches well  
363 with the native structure (blue), while the models from CCMpred (Fig.10(B)) and MetaPSICOV  
364 (Fig.10(C)) do not have a correct fold. To examine the superimposition of our model with its native  
365 structure from various angles, please see <http://raptorx.uchicago.edu/DeepAlign/92913404/>.

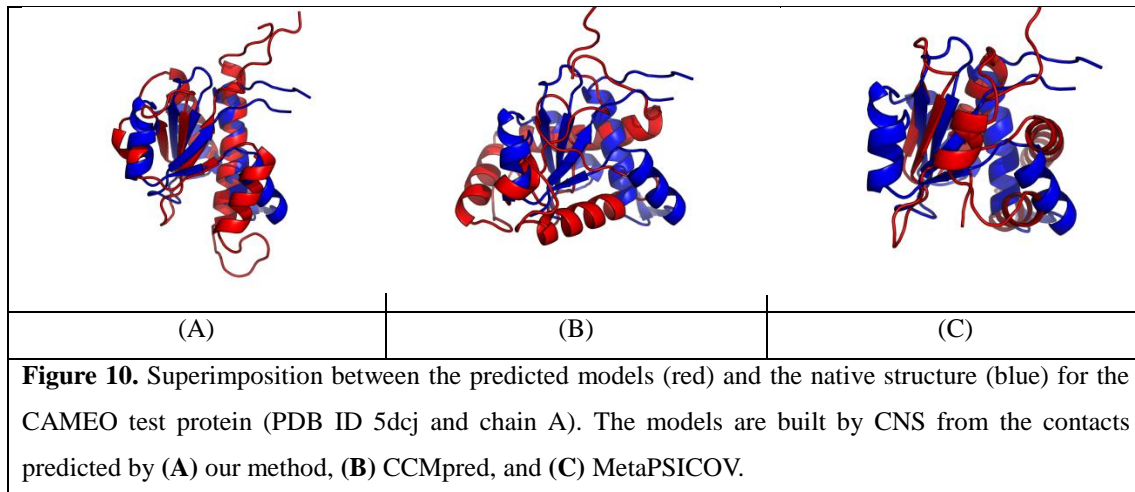

366

367 In terms of TMscore, our models have comparable quality to Robetta, but better than the other servers  
368 (Fig. 11). In terms of IDDT-C $\alpha$  score, our models are better than all the others. In particular, our  
369 method produced better models than the popular homology modeling server HHpredB and our own  
370 template-based modeling server RaptorX, which submitted models with TMscore $\leq$ 0.45.

371 This test protein represents a novel fold. Similar structure search through PDB70 created right before  
372 September 17, 2016 by our in-house structural homolog search tool DeepSearch cannot identify  
373 structurally similar proteins for this test protein. The most structurally similar proteins are 3lr5A and  
374 5ereA, which have TMscore 0.431 and 0.45 with the test protein, respectively. This is consistent with  
375 the fact that none of the template-based servers in CAMEO can predict a good model for this test  
376 protein. By contrast, our contact-assisted model has TMscore 0.52, which is higher than all the  
377 template-based models.



| Server Name        | Predictions | Resp. time<br>(hh:mm:ss) | From | To  | Cov.<br>(%) | IDDT<br>C | IDDT<br>Ca | Avg.<br>IDDT-<br>BS | Avg. IDDT-BS<br>details | QScore | QScore<br>details | CAD-<br>Score | GDT_HA | RMSD  | GDC   | Model<br>Conf. | MaxSub | TMscore |
|--------------------|-------------|--------------------------|------|-----|-------------|-----------|------------|---------------------|-------------------------|--------|-------------------|---------------|--------|-------|-------|----------------|--------|---------|
| Server 60          | Model 1     | 11:38:06                 | 1    | 125 | 100         | 47.88     | 57.13      | 43.45               | CPS1:0.43(1.00)         | -      | -                 | 0.51          | 27.97  | 8.93  | 32.76 | 0.50           | 0.35   | 0.50    |
| Robetta            | Model 1     | 11:58:59                 | 1    | 125 | 100         | 48.12     | 54.58      | 49.79               | CPS1:0.50(1.00)         | -      | -                 | 0.53          | 29.66  | 10.39 | 36.80 | 0.90           | 0.41   | 0.50    |
| Server 56          | Model 1     | 21:07:50                 | 1    | 125 | 100         | 46.12     | 53.12      | 39.74               | CPS1:0.40(1.00)         | -      | -                 | 0.51          | 28.39  | 10.06 | 34.81 | 0.96           | 0.38   | 0.48    |
| Server 58          | Model 1     | 21:06:20                 | 1    | 125 | 100         | 46.12     | 53.12      | 39.74               | CPS1:0.40(1.00)         | -      | -                 | 0.51          | 28.39  | 10.06 | 34.81 | 0.96           | 0.38   | 0.48    |
| RaptorX            | Model 1     | 10:28:22                 | 1    | 125 | 100         | 45.12     | 50.42      | 38.20               | CPS1:0.38(1.00)         | -      | -                 | 0.51          | 26.91  | 10.10 | 32.71 | 0.65           | 0.32   | 0.45    |
| Princeton_TEMPLATE | Model 1     | 04:55:57                 | 1    | 125 | 100         | 44.32     | 50.33      | 37.68               | CPS1:0.38(1.00)         | -      | -                 | 0.47          | 23.73  | 10.69 | 31.45 | 0.50           | 0.33   | 0.45    |
| Server 45          | Model 1     | 10:53:53                 | 1    | 125 | 100         | 44.39     | 49.91      | 35.88               | CPS1:0.36(1.00)         | -      | -                 | 0.51          | 26.70  | 11.97 | 33.12 | 0.64           | 0.34   | 0.46    |
| SPARKS-X           | Model 1     | 00:46:54                 | 1    | 125 | 100         | 42.67     | 49.20      | 36.24               | CPS1:0.36(1.00)         | -      | -                 | 0.49          | 25.64  | 11.71 | 32.24 | 0.54           | 0.33   | 0.45    |
| HHpredB            | Model 1     | 80:54:59                 | 1    | 125 | 100         | 42.56     | 48.88      | 37.32               | CPS1:0.37(1.00)         | -      | -                 | 0.49          | 26.27  | 11.62 | 32.21 | 0.89           | 0.33   | 0.45    |
| Server 55          | Model 1     | 00:08:10                 | 1    | 125 | 100         | 42.14     | 48.44      | 36.60               | CPS1:0.37(1.00)         | -      | -                 | 0.50          | 26.27  | 10.16 | 31.85 | 0.88           | 0.33   | 0.45    |
| Server 54          | Model 1     | 00:00:57                 | 3    | 121 | 95          | 42.29     | 48.43      | 37.01               | CPS1:0.37(1.00)         | -      | -                 | 0.50          | 26.48  | 10.13 | 31.75 | 0.89           | 0.33   | 0.45    |
| SWISS-MODEL        | Model 1     | 00:01:06                 | 3    | 121 | 95          | 41.93     | 48.31      | 34.95               | CPS1:0.35(1.00)         | -      | -                 | 0.49          | 27.33  | 10.15 | 31.78 | 0.90           | 0.33   | 0.45    |
| Server 48          | Model 1     | 00:02:00                 | 3    | 121 | 95          | 41.93     | 48.31      | 34.90               | CPS1:0.35(1.00)         | -      | -                 | 0.49          | 27.33  | 10.15 | 31.78 | 0.90           | 0.33   | 0.45    |
| IntFOLD3-TS        | Model 1     | 22:08:20                 | 1    | 125 | 100         | 42.67     | 48.00      | 38.51               | CPS1:0.39(1.00)         | -      | -                 | 0.47          | 25.42  | 11.87 | 30.96 | 0.74           | 0.31   | 0.44    |

378

379 **Figure 11.** The list of CAMEO-participating servers (only 14 of 20 are displayed) and their model  
380 scores, sorted by IDDT-C $\alpha$ . The rightmost column displays the TMscore of submitted models. Server60  
381 is our contact web server.

### 382 **Study of CAMEO target 5djeB (CAMEO ID: 2016-09-24\_0000052\_1, PDB ID: 5dje)**

383 On September 24, 2016, our contact web server successfully folded one of the hardest CAMEO targets  
384 (PDB ID: 5dje and chain B). This target is an all alpha protein of 140 residues with a novel fold. Table  
385 11 shows that our server produced a much better contact prediction than CCMpred and MetaPSICOV.  
386 Specifically, the contact map predicted by our method has L/5 and L/10 long-range accuracy 50.0%  
387 and 71.4%, respectively, while that by CCMpred and MetaPSICOV has L/5 and L/10 accuracy less  
388 than 30%. CCMpred has low accuracy since HHblits can only find ~330 non-redundant sequence  
389 homologs for this protein, i.e., its Meff=330. Fig. 12 shows the predicted contact maps and their  
390 overlap with the native. Both CCMpred and metaPSICOV failed to predict some long-range contacts.

391 **Table 11.** The long- and medium-range contact prediction accuracy of our method, MetaPSICOV and  
392 CCMpred on the CAMEO target 5djeB.

|            | Long range accuracy |       |       |       | Medium range accuracy |       |       |       |
|------------|---------------------|-------|-------|-------|-----------------------|-------|-------|-------|
|            | L                   | L/2   | L/5   | L/10  | L                     | L/2   | L/5   | L/10  |
| Our method | 0.300               | 0.357 | 0.500 | 0.714 | 0.186                 | 0.229 | 0.357 | 0.357 |
| metaPSICOV | 0.193               | 0.200 | 0.286 | 0.286 | 0.100                 | 0.143 | 0.214 | 0.286 |
| CCMpred    | 0.079               | 0.114 | 0.107 | 0.214 | 0.036                 | 0.029 | 0.071 | 0.143 |

393

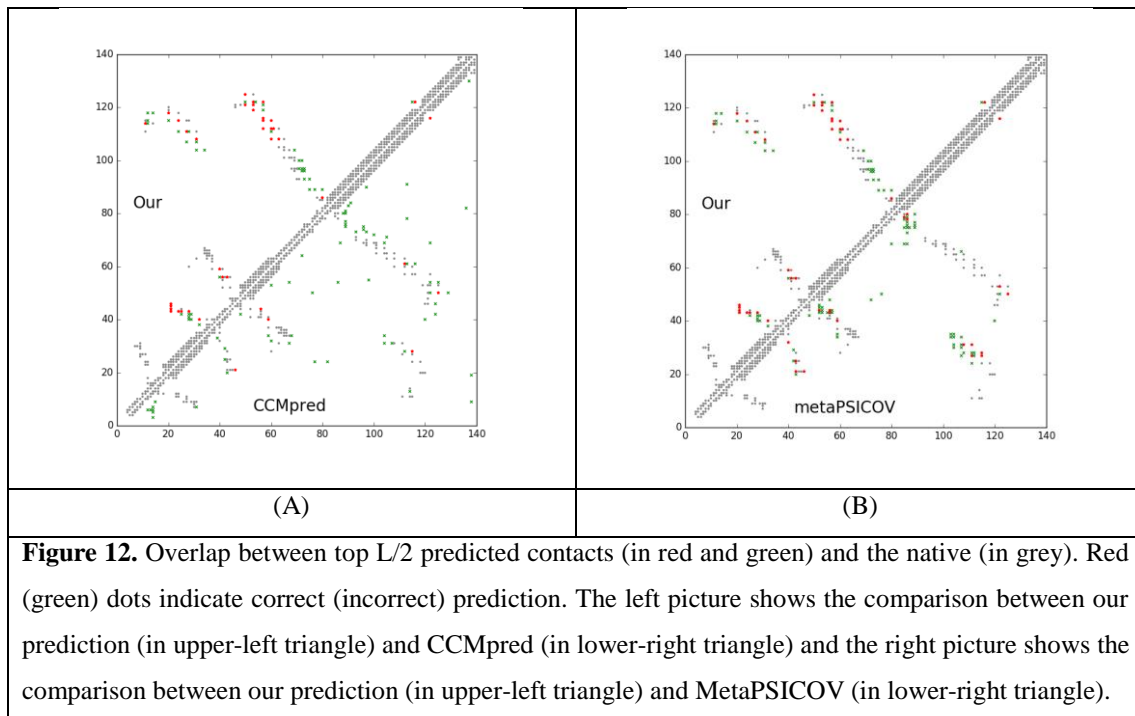

394

395 The first 3D model submitted by our contact server has TMscore 0.65, while the best of our 5 models  
 396 has TMscore 0.65 and RMSD 5.6Å. By contrast, the best of top 5 models built by CNS from  
 397 CCMpred- and MetaPSICOV-predicted contacts have TMscore 0.404 and 0.427, respectively. Fig.  
 398 13(A) shows that all the four alpha helices of our predicted model (in red) matches well with the native  
 399 structure (blue), while the models from CCMpred (Fig. 13(B)) and MetaPSICOV (Fig. 13(C)) fail to  
 400 predict the 3<sup>rd</sup> long helix correctly. To examine the superimposition of our model with its native  
 401 structure from various angles, please see <http://raptorx.uchicago.edu/DeepAlign/26652330/>. Further, all  
 402 other CAMEO registered servers, including the top-notch servers such as HHpred, RaptorX,  
 403 SPARKS-X, and RBO Aleph (template-based and ab initio folding) only submitted models with  
 404 TMscore  $\leq 0.35$ , i.e., failed to predict a correct fold (Fig. 14).

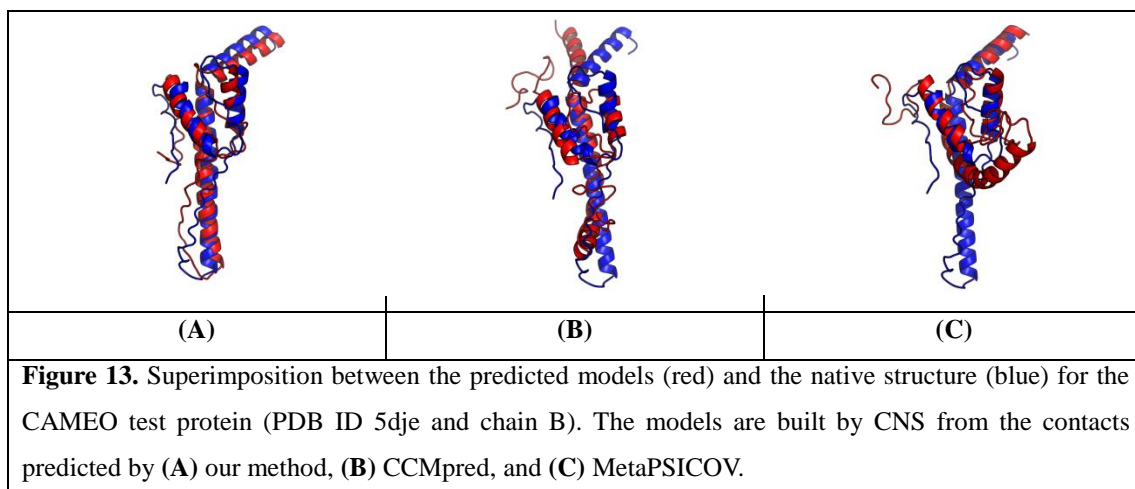

405

406 This test protein represents a novel fold. Similar structure search through PDB70 created right before  
 407 September 24, 2016 by our in-house structural homolog search tool DeepSearch cannot identify  
 408 structurally similar proteins for this test protein. The most structurally similar proteins are 1u71A and  
 409 4x5uA, which have TMscore 0.439 and 0.442 with the test protein, respectively. This is consistent with  
 410 the fact that none of the template-based CAMEO-participating servers predicted a good model for this  
 411 test protein. By contrast, our contact-assisted model has TMscore 0.65, much higher than all the  
 412 template-based models.

| Server Name        | Predictions | Resp. time<br>(hh:mm:ss) | From | To  | Cov<br>(%) | IDDT<br>Co | IDDT<br>Ca | Avg. IDDT-<br>BS | QScore | QScore<br>details | CAD-<br>Score | GDT_HA | RMSD  | GDC   | Model<br>Conf | MaxSub | TMscore |
|--------------------|-------------|--------------------------|------|-----|------------|------------|------------|------------------|--------|-------------------|---------------|--------|-------|-------|---------------|--------|---------|
| Server 60          | Model 1     | 19:20:14                 | 1    | 140 | 100        | 54.43      | 59.22      | -                | -      | -                 | 0.60          | 36.03  | 5.81  | 45.19 | 0.50          | 0.51   | 0.65    |
| RaptorX            | Model 1     | 14:50:24                 | 1    | 140 | 100        | 33.59      | 42.23      | -                | -      | -                 | 0.53          | 18.93  | 15.88 | 19.98 | 0.71          | 0.22   | 0.34    |
| RBO Aleph          | Model 1     | 53:34:20                 | 1    | 140 | 100        | 40.85      | 50.35      | -                | -      | -                 | 0.56          | 16.57  | 14.98 | 16.37 | 0.50          | 0.19   | 0.31    |
| Server 45          | Model 1     | 36:00:52                 | 1    | 140 | 100        | 35.96      | 44.10      | -                | -      | -                 | 0.53          | 19.12  | 20.97 | 20.16 | 0.67          | 0.21   | 0.31    |
| SPARKS-X           | Model 1     | 01:34:53                 | 1    | 140 | 100        | 34.24      | 43.59      | -                | -      | -                 | 0.51          | 16.54  | 24.40 | 15.18 | 0.53          | 0.19   | 0.27    |
| INFOLD3-TS         | Model 1     | 23:58:21                 | 1    | 140 | 100        | 33.49      | 41.34      | -                | -      | -                 | 0.49          | 16.91  | 25.85 | 14.94 | 0.75          | 0.18   | 0.26    |
| Princeton_TEMPLATE | Model 1     | 05:43:56                 | 1    | 140 | 100        | 35.77      | 44.78      | -                | -      | -                 | 0.53          | 20.22  | 23.15 | 15.79 | 0.50          | 0.21   | 0.26    |
| Server 56          | Model 1     | 22:29:49                 | 1    | 140 | 100        | 34.96      | 43.55      | -                | -      | -                 | 0.48          | 15.44  | 23.61 | 14.73 | 0.96          | 0.17   | 0.26    |
| Server 58          | Model 1     | 22:29:22                 | 1    | 140 | 100        | 34.96      | 43.55      | -                | -      | -                 | 0.48          | 15.44  | 23.61 | 14.73 | 0.96          | 0.17   | 0.26    |
| Server 57          | Model 1     | 22:29:51                 | 1    | 140 | 100        | 34.09      | 42.06      | -                | -      | -                 | 0.50          | 16.54  | 26.14 | 14.42 | 0.82          | 0.18   | 0.25    |
| Server 7           | Model 1     | 18:14:55                 | 81   | 140 | 42         | 15.51      | 20.19      | -                | -      | -                 | 0.25          | 16.18  | 14.71 | 15.77 | 0.58          | 0.19   | 0.22    |
| HirpredB           | Model 1     | 00:08:59                 | 1    | 140 | 100        | 32.19      | 41.28      | -                | -      | -                 | 0.53          | 14.71  | 36.79 | 12.95 | 0.61          | 0.15   | 0.21    |
| Server 55          | Model 1     | 00:35:17                 | 1    | 140 | 100        | 30.19      | 37.98      | -                | -      | -                 | 0.53          | 16.36  | 35.62 | 14.87 | 0.66          | 0.17   | 0.21    |
| SWISS-MODEL        | Model 1     | 00:00:14                 | 86   | 127 | 30         | 9.27       | 12.47      | -                | -      | -                 | 0.17          | 16.18  | 11.45 | 14.77 | 0.92          | 0.17   | 0.19    |
| Server 46          | Model 1     | 00:03:45                 | 86   | 127 | 30         | 9.27       | 12.47      | -                | -      | -                 | 0.17          | 16.18  | 11.45 | 14.77 | 0.92          | 0.17   | 0.19    |

413

414 **Figure 14.** The list of CAMEO-participating servers (only 15 of 20 are displayed) and their model  
 415 scores. The rightmost column displays the TMscore of submitted models. Server60 is our contact web  
 416 server.

#### 417 **Study of CAMEO target 5f5pH (CAMEO ID: 2016-10-15\_00000047\_1, PDB ID: 5f5p)**

418 On October 15, 2016, our contact web server successfully folded a very hard CAMEO target  
 419 (PDB ID: 5f5pH, CAMEO ID: 2016-10-15\_00000047\_1). This target is an all alpha protein  
 420 of 217 residues with four helices. Table 12 shows that our server produced a much better  
 421 long-range contact prediction than CCMpred and MetaPSICOV. Specifically, our contact  
 422 prediction has L/5 and L/10 long-range accuracy 76.7% and 95.2%, respectively, while  
 423 MetaPSICOV has L/5 and L/10 accuracy less than 40% and CCMpred has much smaller  
 424 accuracy. CCMpred has very low accuracy since this target has only ~65 non-redundant  
 425 sequence homologs, i.e., its Meff=65. The three methods have low L/k (k=1, 2) medium-range  
 426 accuracy because there are fewer than L/k native medium-range contacts while we use L/k as the  
 427 denominator in calculating accuracy. As shown in Fig. 15, CCMpred predicts too many false  
 428 positives while MetaPSICOV predicts very few correct long-range contacts.

429 **Table 12.** The long- and medium-range contact prediction accuracy of our method, MetaPSICOV and  
 430 CCMpred on the CAMEO target 5f5pH.

|            | Long-range accuracy |       |       |       | Medium-range accuracy |       |       |       |
|------------|---------------------|-------|-------|-------|-----------------------|-------|-------|-------|
|            | L                   | L/2   | L/5   | L/10  | L                     | L/2   | L/5   | L/10  |
| Our method | 0.382               | 0.602 | 0.767 | 0.952 | 0.041                 | 0.083 | 0.209 | 0.381 |

|            |       |       |       |       |       |       |       |       |
|------------|-------|-------|-------|-------|-------|-------|-------|-------|
| metaPSICOV | 0.161 | 0.250 | 0.326 | 0.476 | 0.041 | 0.083 | 0.163 | 0.190 |
| CCMpred    | 0.032 | 0.037 | 0.047 | 0.048 | 0.009 | 0.019 | 0.023 | 0.032 |

431

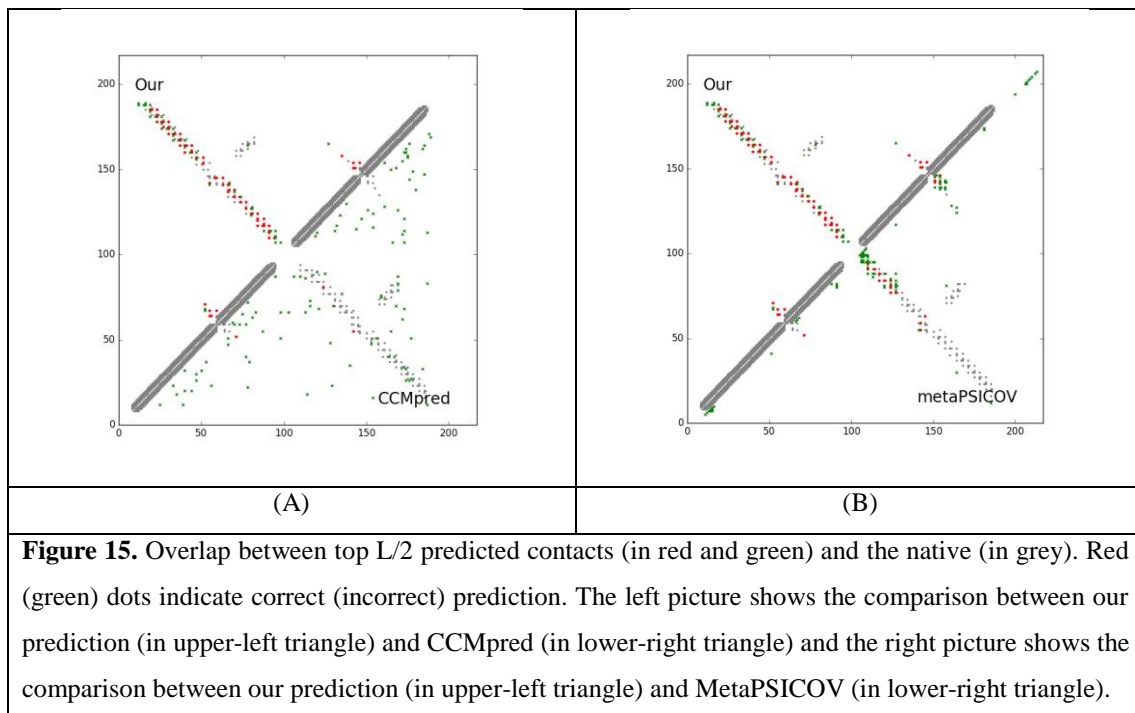

432

433 Our submitted 3D model has TMscore 0.71 and RMSD 4.21Å. By contrast, the best of top 5 models  
434 built by CNS from CCMpred- and MetaPSICOV-predicted contacts have TMscore 0.280 and 0.472,  
435 respectively. Fig. 16(A) shows that our predicted model (in red) match well with the native structure  
436 (blue), while the model from CCMpred (Fig. 16(B)) is completely wrong and the model from  
437 MetaPSICOV (Fig. 16(C)) fails to place the 1<sup>st</sup> and 4<sup>th</sup> helices correctly. Please see  
438 [http://raptorx6.uchicago.edu/ContactMap/myjobs/80735808\\_106702/](http://raptorx6.uchicago.edu/ContactMap/myjobs/80735808_106702/) for the animated superimposition  
439 of our model with its native structure.

440 As shown in the ranking list (see Fig. 17), all the other CAMEO-participating servers, including  
441 Robetta, HHpred, RaptorX, SPARKS-X (template-based modeling), and RBO Aleph (template-based  
442 and ab initio folding) only submitted models with  $\text{TMscore} \leq 0.48$  and  $\text{RMSD} > 43.82\text{\AA}$ . A 3D model  
443 with  $\text{TMscore} < 0.5$  may have a wrong fold while a model with  $\text{TMscore} \geq 0.7$  surely has a correct fold.  
444 That is, our contact server is the only one that predicted a correct fold for this target.

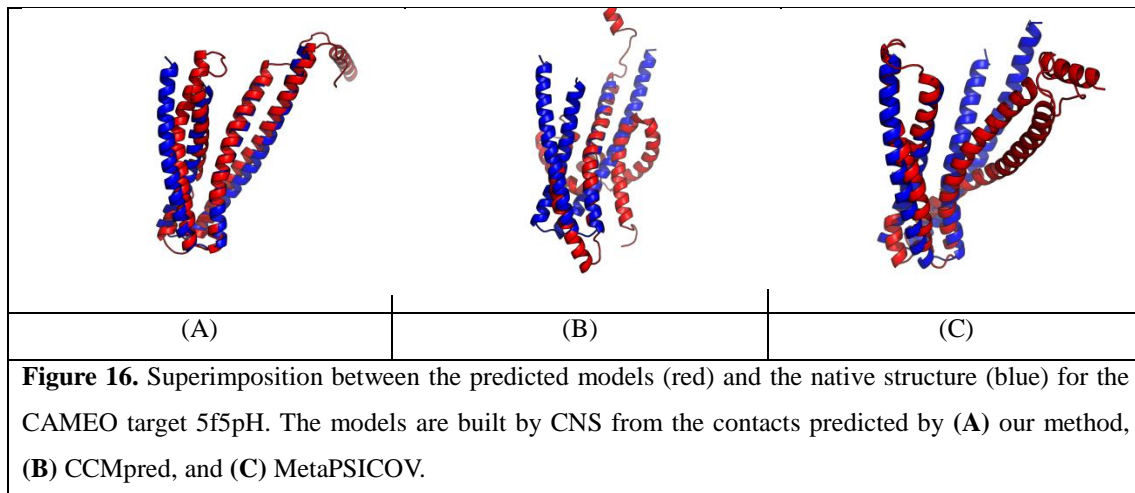

445

| Server Name | Predictions | Resp. time<br>(hh:mm:ss) | From | To  | Cov<br>(%) | IDDT  | IDDT<br>Ca | Avg<br>IDDT-BS | Avg<br>IDDT-BS<br>details | QScore | QScore<br>details | CAD-<br>Score | GDT_HA | RMSD  | GDC   | Model<br>Conf | MaxSub | TMscore |
|-------------|-------------|--------------------------|------|-----|------------|-------|------------|----------------|---------------------------|--------|-------------------|---------------|--------|-------|-------|---------------|--------|---------|
| Server 60   | Model 1     | 08:54:54                 | 1    | 217 | 100        | 62.05 | 74.62      | -              | -                         | -      | -                 | 0.66          | 34.80  | 4.21  | 46.75 | 0.50          | 0.51   | 0.71    |
| Server 55   | Model 1     | 04:57:59                 | 1    | 217 | 100        | 46.69 | 53.25      | -              | -                         | -      | -                 | 0.67          | 36.40  | 49.95 | 37.59 | 0.58          | 0.43   | 0.48    |
| SWISS-MODEL | Model 1     | 00:00:55                 | 10   | 189 | 82         | 46.62 | 53.11      | -              | -                         | -      | -                 | 0.66          | 36.55  | 50.09 | 37.53 | 0.60          | 0.43   | 0.48    |
| Server 54   | Model 1     | 04:33:36                 | 10   | 189 | 82         | 46.62 | 53.11      | -              | -                         | -      | -                 | 0.66          | 36.55  | 50.09 | 37.53 | 0.60          | 0.43   | 0.48    |
| Server 46   | Model 1     | 03:38:25                 | 10   | 189 | 82         | 46.43 | 53.18      | -              | -                         | -      | -                 | 0.66          | 36.99  | 50.09 | 37.55 | 0.58          | 0.44   | 0.48    |
| Server 48   | Model 1     | 00:03:54                 | 10   | 189 | 82         | 46.43 | 53.18      | -              | -                         | -      | -                 | 0.66          | 36.99  | 50.09 | 37.55 | 0.58          | 0.44   | 0.48    |
| Server 0    | Model 1     | 00:31:28                 | 10   | 189 | 82         | 45.68 | 53.07      | -              | -                         | -      | -                 | 0.65          | 36.70  | 50.10 | 37.30 | 0.65          | 0.43   | 0.47    |
| Phyre2      | Model 1     | 00:36:56                 | 12   | 189 | 82         | 43.44 | 52.59      | -              | -                         | -      | -                 | 0.66          | 36.11  | 50.40 | 37.07 | 0.50          | 0.43   | 0.47    |
| Server 19   | Model 1     | 32:52:37                 | 1    | 217 | 100        | 46.45 | 54.13      | -              | -                         | -      | -                 | 0.65          | 30.70  | 44.65 | 33.58 | 0.60          | 0.38   | 0.46    |
| RaptorX     | Model 1     | 11:27:06                 | 1    | 217 | 100        | 43.71 | 52.40      | -              | -                         | -      | -                 | 0.62          | 27.34  | 50.41 | 31.75 | 0.60          | 0.36   | 0.44    |
| Server 61   | Model 1     | 00:08:19                 | 10   | 189 | 82         | 45.47 | 52.90      | -              | -                         | -      | -                 | 0.66          | 31.43  | 49.27 | 31.78 | 0.56          | 0.35   | 0.43    |
| Server 64   | Model 1     | 00:22:11                 | 10   | 189 | 82         | 45.47 | 52.90      | -              | -                         | -      | -                 | 0.66          | 31.43  | 49.27 | 31.78 | 0.56          | 0.35   | 0.43    |
| Server 65   | Model 1     | 00:10:21                 | 10   | 189 | 82         | 45.47 | 52.90      | -              | -                         | -      | -                 | 0.66          | 31.43  | 49.27 | 31.78 | 0.56          | 0.35   | 0.43    |
| Robetta     | Model 1     | 22:40:39                 | 1    | 217 | 100        | 45.01 | 52.84      | -              | -                         | -      | -                 | 0.64          | 30.41  | 43.82 | 31.63 | 0.89          | 0.35   | 0.42    |
| M4T         | Model 1     | 17:10:05                 | 10   | 189 | 82         | 44.45 | 52.48      | -              | -                         | -      | -                 | 0.64          | 24.56  | 48.17 | 27.62 | 0.52          | 0.29   | 0.39    |

446

447 **Figure 17.** The list of CAMEO-participating servers (only 15 of 20 are displayed) and their model  
 448 scores. The rightmost column displays the TMscore of submitted models. Server60 is our contact web  
 449 server.

450 To make sure our best model is not simply copied from the database of solved structures, we search our  
 451 best model against PDB70 created right before October 15, 2016 using our in-house structural homolog  
 452 search tool DeepSearch, which yields two weakly similar proteins 2yfaA and 4k1pA. They have  
 453 TMscore 0.536 and 0.511 with our best model, respectively. This implies that our model is not simply  
 454 copied from a solved structure in PDB.

455 To see if there is a good template in PDB70 for this target, we ran BLAST on this target against PDB70  
 456 and surprisingly, found one protein 3thfA with E-value 3E-16 and sequence identity 35%. In fact, 3thfA  
 457 and 5f5pH are two SD2 proteins from Drosophila and Human(41), respectively. Although they are  
 458 homologous, they adopt different conformations and oligomerizations. In particular, 3thfA is a dimer  
 459 and each monomer adopts a fold consisting of three segmented anti-parallel coiled-coil(42), whereas  
 460 5f5pH is a monomer that adopts a two segmented antiparallel coiled-coil(41) Superimposing the  
 461 Human SD2 monomer onto the Drosophila SD2 dimer shows that the former structure was located  
 462 directly in between the two structurally identical halves of the latter structure (see Fig. 18(A)). That is,

463 if our method predicts the contacts of 5f5pH by simply copying from 3thfA, it will produce a wrong 3D  
464 model.

465 Since SD2 protein may have conformational change when docking with Rock SBD protein, we check  
466 if the Drosophila SD2 monomer would change to a similar fold as the Human SD2 monomer.  
467 According to(41), the Human SD2 adopts a similar fold no matter whether it docks with the Rock SBD  
468 or not. According to the paper(42), although the Drosophila SD2 dimer may have conformational  
469 change in the presence of Rock, the change only occurs in the hinge regions, but not at the adjacent  
470 identical halves. That is, even conformational change happens, the Drosophila SD2 monomer would  
471 not resemble the Human SD2 monomer (shown in Fig. 18(B)).

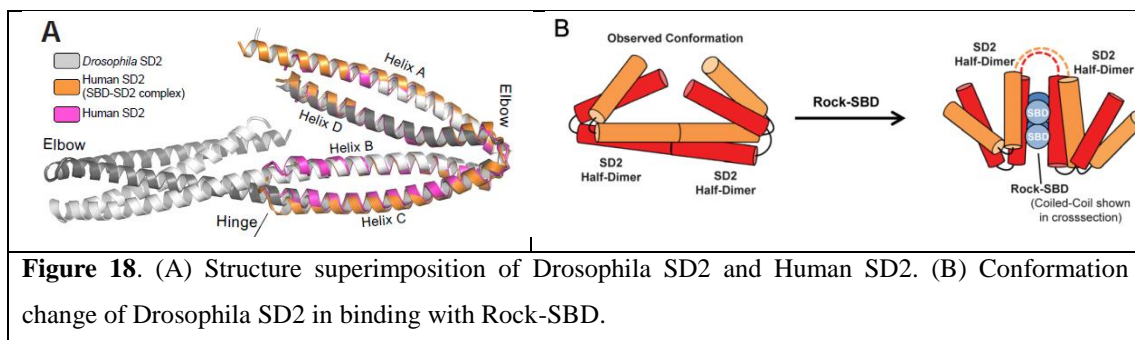

**Figure 18.** (A) Structure superimposition of Drosophila SD2 and Human SD2. (B) Conformation change of Drosophila SD2 in binding with Rock-SBD.

472

## 473 Conclusion and Discussion

474 In this paper we have presented a new deep (supervised) learning method that can greatly improve  
475 protein contact prediction. Our method distinguishes itself from previous supervised learning methods  
476 in that we employ a concatenation of two deep residual neural networks to model sequence-contact  
477 relationship, one for modeling of sequential features (i.e., sequence profile, predicted secondary  
478 structure and solvent accessibility) and the other for modeling of pairwise features (e.g., coevolution  
479 information). Ultra-deep residual network is the latest breakthrough in computer vision and has  
480 demonstrated the best performance in the computer vision challenge tasks (similar to CASP) in 2015.  
481 Our method is also unique in that we model a contact map as an individual image and predict contacts  
482 of a protein simultaneously, which allows us to take into consideration high-order residue correlation.  
483 By contrast, existing supervised learning methods predict if two residues form a contact or not  
484 independent of the other residue pairs. Our experimental results show that our method dramatically  
485 improves contact prediction, exceeding currently the best methods (e.g., CCMpred, Evfold, PSICOV  
486 and MetaPSICOV) by a very large margin. Even without using any force fields, ab initio folding using  
487 our predicted contacts as restraints can yield 3D structural models of correct fold for many test proteins.  
488 Further, our experimental results also show that our contact-assisted models are much better than  
489 template-based models built from the training proteins of our deep model. We expect that our contact  
490 prediction methods can help reveal much more biological insights for those protein families without  
491 solved structures and close structural homologs.

492 **Our method outperforms ECA due to a couple of reasons. First, ECA predicts contacts using**

493 information only in a single protein family, while our method learns sequence-structure relationship  
494 from thousands of protein families. Second, ECA does not consider contact occurring patterns or  
495 higher-order correlation, while our deep architecture can capture high-order residue correlation very  
496 well. Our method uses a subset of protein features used by MetaPSICOV, but performs much better  
497 than MetaPSICOV mainly because we explicitly model contact patterns (or high-order correlation) by  
498 predicting contacts of a single protein simultaneously. MetaPSICOV predicts contacts by a 2-stage  
499 approach. In the 1<sup>st</sup> stage, MetaPSICOV predicts if there is a contact between a pair of residues  
500 independent of the other residues. In the 2<sup>nd</sup> stage, MetaPSICOV considers the correlation between one  
501 contact and its neighboring contacts (and non-contacts), but not in a very good way. In particular, the  
502 prediction errors in the 1<sup>st</sup> stage of MetaPSICOV cannot be corrected in the 2<sup>nd</sup> stage since two stages  
503 are trained separately. By contrast, we train all 2D convolution layers simultaneously (each convolution  
504 layer is equivalent to one stage) so that later stages can correct prediction errors in early stages. In  
505 addition, our deep network enables us to model much higher-order correlation than a shallow network  
506 employed by MetaPSICOV and thus, make use of information in a much larger context.

507 Our deep model does not predict contact maps by simply recognizing them from PDB. We remove  
508 redundancy by a rigorous criterion so that there are no training proteins with sequence identity >25% or  
509 BLAST E-value <0.1 with any test proteins. Our contact-assisted models also have better quality than  
510 homology models, so it is unlikely that our predicted contact maps are simply copied from the training  
511 proteins. We also did one more experiment to further test this. In particular, we trained a deep model  
512 using only non-membrane proteins and then test this model by the 398 membrane proteins. The  
513 non-membrane proteins used in training have sequence identity <25% and BLAST E-value>0.1 with  
514 the test membrane proteins, so there is little redundancy between the training and test proteins. Such a  
515 model performs very well on membrane protein contact prediction even in transmembrane regions and  
516 can correctly fold about half of the test membrane proteins. By contrast, if we use the training  
517 non-membrane proteins to build homology models for the 398 test membrane proteins, the average  
518 TMscore of the homology models is no more than 0.17, which is the expected TMscore of any two  
519 randomly-chosen proteins.

520 We did a few experiments by using different combinations of input features. First of all, the  
521 co-evolution strength produced by CCMpred is the most important input features. Without it, the top  
522 L/10 long-range prediction accuracy may drop significantly (0.15 or more). The depth of our deep  
523 model is also very important, as evidenced by the fact that our deep method has much better accuracy  
524 than MetaPSICOV although we use a subset of protein features used by MetaPSICOV. We also tested a  
525 deep model with 9 and 30 layers, respectively. A 9-layer and 30-layer model has top L/10 accuracy  
526 ~0.1 and ~0.03 worse than a 60-layer model, respectively. The pairwise contact potential and mutual  
527 information may impact the accuracy by 0.02-0.03. The secondary structure and solvent accessibility  
528 do not impact the accuracy much maybe because our deep model can implicitly learn them from  
529 sequence profile.

530 An interesting finding is that although our training set contains only ~100 membrane proteins, our  
531 model works well for membrane proteins, much better than CCMpred and MetaPSICOV. Even without

532 using any membrane proteins in our training set, our deep models have almost the same accuracy on  
533 membrane proteins as those trained with membrane proteins (data not shown). This implies that the  
534 sequence-structure relationship learned by our model from non-membrane proteins can generalize well  
535 to membrane protein contact prediction. We are going to study if we can further improve contact  
536 prediction accuracy of membrane proteins by including many more membrane proteins in the training  
537 set.

538 We may further improve contact prediction accuracy by enlarging the training set. First, currently there  
539 are more than 10,000 proteins in PDB25, so we can obtain many more training proteins by using the  
540 latest PDB25. Second, in removing redundancy we may relax the BLAST E-value cutoff to 0.001 or  
541 simply drop it to obtain more training proteins. This will help improve the top L/k (k=1,2,5,10) contact  
542 prediction accuracy by 1-3% and accordingly the quality of the resultant 3D models by 0.01-0.02 in  
543 terms of TMscore. **We may also improve the 3D model quality by combining our predicted contacts  
544 with energy function and fragment assembly. For example, we may feed our predicted contacts to  
545 Rosetta to build 3D models. Compared to CNS, Rosetta makes use of energy function and more local  
546 structural restraints through fragment assembly and thus, shall result in much better 3D models. Finally,  
547 instead of predicting contacts, our deep learning model actually can predict inter-residue distance  
548 distribution (i.e., distance matrix), which provides finer-grained information than contact maps and thus,  
549 shall benefit 3D structure modeling more than predicted contacts.**

550 Our model achieves pretty good performance when using around 60-70 convolutional layers. A natural  
551 question to ask is can we further improve prediction accuracy by using many more convolutional layers?  
552 In computer vision, it has been shown that a 1001-layer residual neural network can yield better  
553 accuracy for image-level classification than a 100-layer network (but no result on pixel-level labeling is  
554 reported). Currently we cannot apply more than 100 layers to our model due to insufficient memory of  
555 a GPU card (12G). We plan to overcome the memory limitation by extending our training algorithm to  
556 run on multiple GPU cards. Then we will train a model with hundreds of layers to see if we can further  
557 improve prediction accuracy or not.



## 558 Method

### 559 Deep learning model details

560 **Residual network blocks.** Our network consists of two  
561 residual neural networks, each in turn consisting of some  
562 residual blocks concatenated together. Fig. 19 shows an  
563 example of a residual block consisting of 2 convolution  
564 layers and 2 activation layers. In this figure,  $X_i$  and  $X_{i+1}$   
565 are the input and output of the block, respectively. The  
566 activation layer conducts a simple nonlinear  
567 transformation of its input without using any parameters.  
568 Here we use the ReLU activation function (30) for such a  
569 transformation. Let  $f(X_i)$  denote the result of  $X_i$  going  
570 through the two activation layers and the two convolution  
571 layers. Then,  $X_{i+1}$  is equal to  $X_i + f(X_i)$ . That is,  $X_{i+1}$  is a  
572 combination of  $X_i$  and its nonlinear transformation. Since  
573  $f(X_i)$  is equal to the difference between  $X_{i+1}$  and  $X_i$ ,  $f$  is  
574 called residual function and this network called residual  
575 network. In the first residual network,  $X_i$  and  $X_{i+1}$   
576 represent sequential features and have dimension  $L \times n_i$  and  
577  $L \times n_{i+1}$ , respectively, where  $L$  is protein sequence length

578 and  $n_i$  ( $n_{i+1}$ ) can be interpreted as the number of features or hidden neurons at each position (i.e.,  
579 residue). In the 2<sup>nd</sup> residual network,  $X_i$  and  $X_{i+1}$  represent pairwise features and have dimension  $L \times L \times n_i$   
580  $\times n_i$  and  $L \times L \times n_{i+1}$ , respectively, where  $n_i$  ( $n_{i+1}$ ) can be interpreted as the number of features or hidden  
581 neurons at one position (i.e., residue pair). Typically, we enforce  $n_i \leq n_{i+1}$  since one position at a higher  
582 level is supposed to carry more information. When  $n_i < n_{i+1}$ , in calculating  $X_i + f(X_i)$  we shall pad zeros  
583 to  $X_i$  so that it has the same dimension as  $X_{i+1}$ . To speed up training, we also add a batch normalization  
584 layer (43) before each activation layer, which normalizes its input to have mean 0 and standard  
585 deviation 1. The filter size (i.e., window size) used by a 1D convolution layer is 17 while that used by a  
586 2D convolution layer is  $3 \times 3$  or  $5 \times 5$ . By stacking many residual blocks together, even if at each  
587 convolution layer we use a small window size, our network can model very long-range  
588 interdependency between input features and contacts as well as the long-range interdependency  
589 between two different residue pairs. We fix the depth (i.e., the number of convolution layers) of the 1D  
590 residual network to 6, but vary the depth of the 2D residual network. Our experimental results show  
591 that with  $\sim 60$  hidden neurons at each position and  $\sim 60$  convolution layers for the 2<sup>nd</sup> residual network,  
592 our model can yield pretty good performance. Note that it has been shown that for image classification  
593 a convolutional neural network with a smaller window size but many more layers usually outperforms  
594 a network with a larger window size but fewer layers. Further, a 2D convolutional neural network with  
595 a smaller window size also has a smaller number of parameters than a network with a larger window

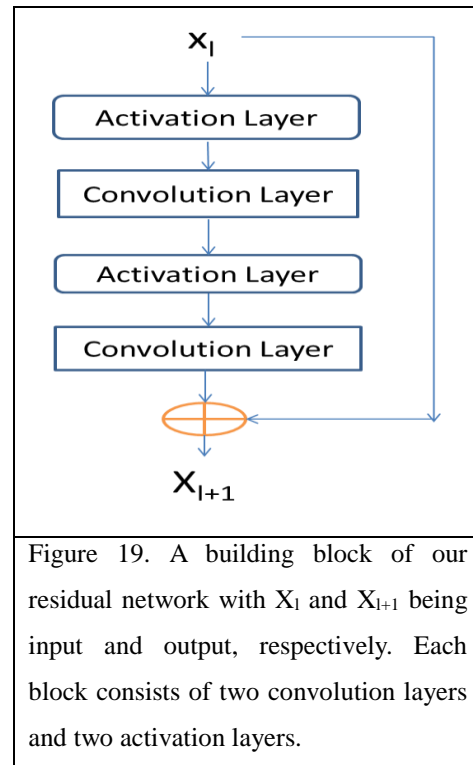

596 size.

597 Our deep learning method for contact prediction is unique in at least two aspects. First, our model  
598 employs two multi-layer residual neural networks, which have not been applied to contact prediction  
599 before. Residual neural networks can pass both linear and nonlinear information from end to end (i.e.,  
600 from the initial input to the final output). Second, we do contact prediction on the whole contact map  
601 by treating it as an individual image. In contrast, previous supervised learning methods separate the  
602 prediction of one residue pair from the others. By predicting contacts of a protein simultaneously, we  
603 can easily model long-range contact correlation and high-order residue correlation and long-range  
604 correlation between a contact and input features.

605 **Convolutional operation.** Here we briefly describe the convolution procedure. All popular deep  
606 learning development toolkits such as Theano (<http://deeplearning.net/software/theano/>) and  
607 Tensorflow (<https://www.tensorflow.org/>) have provided an API (application programming interface)  
608 for convolution so that we do not need to implement it by ourselves. There are also some good tutorials  
609 about convolutional neural networks. See <http://deeplearning.net/tutorial/lenet.html>,  
610 <https://www.nervanasys.com/convolutional-neural-networks/>, and paper (44) for an example. Briefly  
611 speaking, a 1D convolution operation is de facto matrix-vector multiplication and 2D convolution can  
612 be interpreted similarly. Let  $X$  and  $Y$  (with dimensions  $L \times m$  and  $L \times n$ , respectively) be the input and  
613 output of a 1D convolutional layer, respectively. Let the window size be  $2w+1$  and  $s=(2w+1)m$ . The  
614 convolutional operator that transforms  $X$  to  $Y$  can be represented as a 2D matrix with dimension  $n \times s$ ,  
615 denoted as  $C$ . Each convolutional layer may have a different  $C$ , but  $C$  is protein length-independent.  
616 Let  $X_i$  be a submatrix of  $X$  centered at residue  $i$  ( $1 \leq i \leq L$ ) with dimension  $(2w+1) \times m$ , and  $Y_i$  be the  $i$ -th  
617 row of  $Y$ . We may calculate  $Y_i$  by first flattening  $X_i$  to a vector of length  $s$  and then multiplying  $C$  and  
618 the flattened  $X_i$ .

619 **Conversion of sequential features to pairwise features.** We convert the output of the first module of  
620 our model (i.e., the 1-d residual neural network) to a 2D representation using an operation similar to  
621 outer product. Simply speaking, let  $v = \{v_1, v_2, \dots, v_i, \dots, v_L\}$  be the final output of the first module  
622 where  $L$  is protein sequence length and  $v_i$  is a feature vector storing the output information for residue  $i$ .  
623 For a pair of residues  $i$  and  $j$ , we concatenate  $v_i$ ,  $v_{(i+j)/2}$  and  $v_j$  to a single vector and use it as one input  
624 feature of this residue pair. The input features for this pair also include mutual information, the EC  
625 information calculated by CCMpred and pairwise contact potential (45, 46).

626 **Loss function.** We use maximum-likelihood method to train model parameters. That is, we maximize  
627 the occurring probability of the native contacts (and non-contacts) of the training proteins. Therefore,  
628 the loss function is defined as the negative log-likelihood averaged over all the residue pairs of the  
629 training proteins. Since the ratio of contacts among all the residue pairs is very small, to make the  
630 training algorithm converge fast, we assign a larger weight to the residue pairs forming a contact. The  
631 weight is assigned such that the total weight assigned to contacts is approximately 1/8 of the number of  
632 non-contacts in the training set.

633 **Regularization and optimization.** To prevent overfitting, we employ  $L_2$ -norm regularization to reduce

634 the parameter space. That is, we want to find a set of parameters with a small  $L_2$  norm to minimize the  
635 loss function, so the final objective function to be minimized is the sum of loss function and the  $L_2$   
636 norm of the model parameters (multiplied by a regularization factor). We use a stochastic gradient  
637 descent algorithm to minimize the objective function. It takes 20-30 epochs (each epoch scans through  
638 all the training proteins exactly once) to obtain a very good solution. The whole algorithm is  
639 implemented by Theano (47) and mainly runs on GPU.

640 **Training and dealing with proteins of different lengths.** We train our deep network in a minibatch  
641 mode, which is routinely used in deep learning. That is, at each iteration of our training algorithm, we  
642 use a minibatch of proteins to calculate gradient and update the model parameters. A minibatch may  
643 have one or several proteins. We sort all training proteins by length and group proteins of similar  
644 lengths into minibatches. Considering that most proteins have length up to 600 residues, proteins in a  
645 minibatch often have the same length. In the case that they do not have the same length, we add zero  
646 padding to shorter proteins. Our convolution operation is protein-length independent, so two different  
647 minibatches can have different protein lengths. We have tested minibatches with only a single protein  
648 or with several proteins. Both work well. However, it is much easier to implement minibatches with  
649 only a single protein.

650 Since our convolutional operation is protein length-independent, we do not need to cut a long protein  
651 into segments in predicting contact maps. Instead we predict contacts in the whole chain  
652 simultaneously. There is no need to use zero padding when only a single protein is predicted. When  
653 several proteins are predicted simultaneously, zero padding is needed to make them have the same  
654 length.

## 655 **Training and test data**

656 We test our method using some public datasets, including the 150 Pfam families (5), the 105 CASP11  
657 test proteins, 76 recently-released hard CAMEO test proteins (Supplementary Table 1) and 398  
658 membrane proteins (Supplementary Table 2). For the CASP test proteins, we use the official domain  
659 definitions, but we do not parse a CAMEO or membrane protein into domains.

660 Our training set is a subset of PDB25 created in February 2015, in which any two proteins share less  
661 than 25% sequence identity. We exclude a protein from the training set if it satisfies one of the  
662 following conditions: (i) sequence length smaller than 26 or larger than 700, (ii) resolution worse than  
663 2.5Å, (iii) has domains made up of multiple protein chains, (iv) no DSSP information, and (v) there is  
664 inconsistency between its PDB, DSSP and ASTRAL sequences (48). Finally, we also exclude the  
665 proteins sharing >25% sequence identity or having a BLAST E-value <0.1 with any of our test proteins.  
666 In total there are 6767 proteins in our training set, from which we have trained 7 different models. For  
667 each model, we randomly sampled ~6000 proteins from the training set to train the model and used the  
668 remaining proteins to validate the model and determine the hyper-parameters (i.e., regularization  
669 factor). The final model is the average of these 7 models.

## 670 Protein features

671 We use similar but fewer protein features as MetaPSICOV. In particular, the input features include  
672 protein sequence profile (i.e., position-specific scoring matrix), predicted 3-state secondary structure  
673 and 3-state solvent accessibility, direct co-evolutionary information generated by CCMpred, mutual  
674 information and pairwise potential (45, 46). To derive these features, we need to generate MSA  
675 (multiple sequence alignment). For a training protein, we run PSI-BLAST (with E-value 0.001 and 3  
676 iterations) to search the NR (non-redundant) protein sequence database dated in October 2012 to find  
677 its sequence homologs, and then build its MSA and sequence profile and predict other features (i.e.,  
678 secondary structure and solvent accessibility). **Sequence profile is represented as a 2D matrix with  
679 dimension  $L \times 20$  where  $L$  is the protein length. Predicted secondary structure is represented as a 2D  
680 matrix with dimension  $L \times 3$  (each entry is a predicted score or probability), so is the predicted solvent  
681 accessibility. Concatenating them together, we have a 2D matrix with dimension  $L \times 26$ , which is the  
682 input of our 1D residual network.**

683 For a test protein, we generate four different MSAs by running HHblits (38) with 3 iterations and  
684 E-value set to 0.001 and 1, respectively, to search through the uniprot20 HMM library released in  
685 November 2015 and February 2016. From each individual MSA, we derive one sequence profile and  
686 employ our in-house tool RaptorX-Property (49) to predict the secondary structure and solvent  
687 accessibility accordingly. That is, for each test protein we generate 4 sets of input features and  
688 accordingly 4 different contact predictions. Then we average these 4 predictions to obtain the final  
689 contact prediction. This averaged contact prediction is about 1-2% better than that predicted from a  
690 single set of features (detailed data not shown). Although currently there are quite a few packages that  
691 can generate direct evolutionary coupling information, we only employ CCMpred to do so because it  
692 runs fast on GPU (4).

## 693 Programs to compare and evaluation metrics

694 We compare our method with PSICOV (5), Evfold (6), CCMpred (4), plmDCA, Gremlin, and  
695 MetaPSICOV (9). The first 5 methods conduct pure DCA while MetaPSICOV employs supervised  
696 learning. MetaPSICOV (9) performed the best in CASP11 (31). CCMpred, plmDCA, Gremlin perform  
697 similarly, but better than PSICOV and Evfold. All the programs are run with parameters set according  
698 to their respective papers. We evaluate the accuracy of the top  $L/k$  ( $k=10, 5, 2, 1$ ) predicted contacts  
699 where  $L$  is protein sequence length. The prediction accuracy is defined as the percentage of native  
700 contacts among the top  $L/k$  predicted contacts. We also divide contacts into three groups according to  
701 the sequence distance of two residues in a contact. That is, a contact is short-, medium- and long-range  
702 when its sequence distance falls into  $[6, 11]$ ,  $[12, 23]$ , and  $\geq 24$ , respectively.

## 703 Calculation of Meff

704 Meff measures the amount of homologous information in an MSA (multiple sequence alignment). It  
705 can be interpreted as the number of non-redundant sequence homologs in an MSA when 70% sequence  
706 identity is used as cutoff. To calculate Meff, we first calculate the sequence identity between any two

707 proteins in the MSA. Let a binary variable  $S_{ij}$  denote the similarity between two protein sequences  $i$  and  
708  $j$ .  $S_{ij}$  is equal to 1 if and only if the sequence identity between  $i$  and  $j$  is at least 70%. For a protein  $i$ , we  
709 calculate the sum of  $S_{ij}$  over all the proteins (including itself) in the MSA and denote it as  $S_i$ . Finally,  
710 we calculate  $M_{eff}$  as the sum of  $1/S_i$  over all the protein sequences in this MSA.

### 711 **3D model construction by contact-assisted folding**

712 We use a similar approach as described in (11) to build the 3D models of a test protein by feeding  
713 predicted contacts and secondary structure to the Crystallography & NMR System (CNS) suite (32).  
714 We predict secondary structure using our in-house tool RaptorX-Property (49) and then convert it to  
715 distance, angle and h-bond restraints using a script in the Confold package (11). For each test protein,  
716 we choose top  $2L$  predicted contacts ( $L$  is sequence length) no matter whether they are short-, medium-  
717 or long-range and then convert them to distance restraints. That is, a pair of residues predicted to form a  
718 contact is assumed to have distance between  $3.5\text{\AA}$  and  $8.0\text{\AA}$ . In current implementation, we do not use  
719 any force fields to help with folding. We generate twenty 3D structure models using CNS and select top  
720 5 models by the NOE score yielded by CNS(32). The NOE score mainly reflects the degree of violation  
721 of the model against the input constraints (i.e., predicted secondary structure and contacts). The lower  
722 the NOE score, the more likely the model has a higher quality. When CCMpred- and  
723 MetaPSICOV-predicted contacts are used to build 3D models, we also use the secondary structure  
724 predicted by RaptorX-Property to warrant a fair comparison.

### 725 **Template-based modeling (TBM) of the test proteins**

726 To generate template-based models (TBMs) for a test protein, we first run HHblits (with the  
727 UniProt20\_2016 library) to generate an HMM file for the test protein, then run HHsearch with this  
728 HMM file to search for the best templates among the 6767 training proteins of our deep learning model,  
729 and finally run MODELLER to build a TBM from each of the top 5 templates.

### 730 **Author contributions**

731 J.X. conceived the project, developed the algorithm and wrote the paper. S.W. did data preparation and  
732 analysis and helped with algorithm development and paper writing. S.S. helped with algorithm  
733 development and data analysis. R.Z. helped with data analysis. Z.L. helped with algorithm  
734 development.

### 735 **Acknowledgements**

736 This work is supported by National Institutes of Health grant R01GM089753 to J.X. and National  
737 Science Foundation grant DBI-1564955 to J.X. The authors are also grateful to the support of Nvidia  
738 Inc. and the computational resources provided by XSEDE.

### 739 **References**

740 1. Kim DE, DiMaio F, Yu - Rwei Wang R, Song Y, Baker D. One contact for every twelve residues  
741 allows robust and accurate topology - level protein structure modeling. *Proteins: Structure, Function,*

- 742 and Bioinformatics. 2014;82(S2):208-18.
- 743 2. de Juan D, Pazos F, Valencia A. Emerging methods in protein co-evolution. *Nature Reviews*
- 744 *Genetics*. 2013;14(4):249-61.
- 745 3. Weigt M, White RA, Szurmant H, Hoch JA, Hwa T. Identification of direct residue contacts in
- 746 protein-protein interaction by message passing. *P Natl Acad Sci USA*. 2009 Jan 6;106(1):67-72.
- 747 4. Seemayer S, Gruber M, Söding J. CCMpred—fast and precise prediction of protein residue–
- 748 residue contacts from correlated mutations. *Bioinformatics*. 2014;30(21):3128-30.
- 749 5. Jones DT, Buchan DW, Cozzetto D, Pontil M. PSICOV: precise structural contact prediction using
- 750 sparse inverse covariance estimation on large multiple sequence alignments. *Bioinformatics*.
- 751 2012;28(2):184-90.
- 752 6. Marks DS, Colwell LJ, Sheridan R, Hopf TA, Pagnani A, Zecchina R, et al. Protein 3D structure
- 753 computed from evolutionary sequence variation. *PloS one*. 2011;6(12):e28766.
- 754 7. Ekeberg M, Hartonen T, Aurell E. Fast pseudolikelihood maximization for direct-coupling
- 755 analysis of protein structure from many homologous amino-acid sequences. *J Comput Phys*. 2014 Nov
- 756 1;276:341-56.
- 757 8. Kamisetty H, Ovchinnikov S, Baker D. Assessing the utility of coevolution-based residue–residue
- 758 contact predictions in a sequence-and structure-rich era. *Proceedings of the National Academy of*
- 759 *Sciences*. 2013;110(39):15674-9.
- 760 9. Jones DT, Singh T, Kosciölek T, Tetchner S. MetaPSICOV: combining coevolution methods for
- 761 accurate prediction of contacts and long range hydrogen bonding in proteins. *Bioinformatics*.
- 762 2015;31(7):999-1006.
- 763 10. Ma J, Wang S, Wang Z, Xu J. Protein contact prediction by integrating joint evolutionary coupling
- 764 analysis and supervised learning. *Bioinformatics*. 2015:btv472.
- 765 11. Adhikari B, Bhattacharya D, Cao R, Cheng J. CONFOLD: residue - residue contact - guided ab
- 766 initio protein folding. *Proteins: Structure, Function, and Bioinformatics*. 2015;83(8):1436-49.
- 767 12. Wang S, Li W, Zhang R, Liu S, Xu J. CoinFold: a web server for protein contact prediction and
- 768 contact-assisted protein folding. *Nucleic acids research*. 2016:gkw307.
- 769 13. Di Lena P, Nagata K, Baldi P. Deep architectures for protein contact map prediction.
- 770 *Bioinformatics*. 2012;28(19):2449-57.
- 771 14. Ekeberg M, Lökvist C, Lan Y, Weigt M, Aurell E. Improved contact prediction in proteins: using
- 772 pseudolikelihoods to infer Potts models. *Phys Rev E*. 2013;87(1):012707.
- 773 15. Göbel U, Sander C, Schneider R, Valencia A. Correlated mutations and residue contacts in
- 774 proteins. *Proteins: Structure, Function, and Bioinformatics*. 1994;18(4):309-17.
- 775 16. Morcos F, Pagnani A, Lunt B, Bertolino A, Marks DS, Sander C, et al. Direct-coupling analysis of
- 776 residue coevolution captures native contacts across many protein families. *Proceedings of the National*
- 777 *Academy of Sciences*. 2011;108(49):E1293-E301.
- 778 17. Skwark MJ, Raimondi D, Michel M, Elofsson A. Improved contact predictions using the
- 779 recognition of protein like contact patterns. *PLoS Comput Biol*. 2014;10(11):e1003889.
- 780 18. Wu S, Zhang Y. A comprehensive assessment of sequence-based and template-based methods for
- 781 protein contact prediction. *Bioinformatics*. 2008;24(7):924-31.
- 782 19. Wang Z, Xu J. Predicting protein contact map using evolutionary and physical constraints by
- 783 integer programming. *Bioinformatics*. 2013;29(13):i266-i73.
- 784 20. He K, Zhang X, Ren S, Sun J. Deep residual learning for image recognition. *arXiv preprint*
- 785 *arXiv:151203385*. 2015.
- 786 21. Krizhevsky A, Hinton G. Convolutional deep belief networks on cifar-10. Unpublished
- 787 manuscript. 2010;40.
- 788 22. Srivastava RK, Greff K, Schmidhuber J, editors. Training very deep networks. *Advances in neural*
- 789 *information processing systems*; 2015.
- 790 23. Hinton G, Deng L, Yu D, Dahl GE, Mohamed A-r, Jaitly N, et al. Deep neural networks for
- 791 acoustic modeling in speech recognition: The shared views of four research groups. *IEEE Signal*
- 792 *Processing Magazine*. 2012;29(6):82-97.
- 793 24. LeCun Y, Bengio Y, Hinton G. Deep learning. *Nature*. 2015;521(7553):436-44.
- 794 25. Szegedy C, Liu W, Jia Y, Sermanet P, Reed S, Anguelov D, et al., editors. Going deeper with
- 795 convolutions. *Proceedings of the IEEE Conference on Computer Vision and Pattern Recognition*; 2015.
- 796 26. Moult J, Fidelis K, Kryshtafovych A, Schwede T, Tramontano A. Critical assessment of methods
- 797 of protein structure prediction (CASP)—round x. *Proteins: Structure, Function, and Bioinformatics*.
- 798 2014;82(S2):1-6.
- 799 27. Moult J, Fidelis K, Kryshtafovych A, Schwede T, Tramontano A. Critical assessment of methods
- 800 of protein structure prediction: Progress and new directions in round XI. *Proteins: Structure, Function,*

- 801 and Bioinformatics. 2016.
- 802 28. Haas J, Roth S, Arnold K, Kiefer F, Schmidt T, Bordoli L, et al. The Protein Model Portal—a  
803 comprehensive resource for protein structure and model information. Database. 2013;2013:bat031.
- 804 29. Pinheiro PH, Collobert R, editors. Recurrent Convolutional Neural Networks for Scene Labeling.  
805 ICML; 2014.
- 806 30. Nair V, Hinton GE, editors. Rectified linear units improve restricted boltzmann machines.  
807 Proceedings of the 27th International Conference on Machine Learning (ICML-10); 2010.
- 808 31. Monastyrskyy B, D'Andrea D, Fidelis K, Tramontano A, Kryshtafovych A. New encouraging  
809 developments in contact prediction: Assessment of the CASP11 results. Proteins: Structure, Function,  
810 and Bioinformatics. 2015.
- 811 32. Briinger AT, Adams PD, Clore GM, DeLano WL, Gros P, Grosse-Kunstleve RW, et al.  
812 Crystallography & NMR system: A new software suite for macromolecular structure determination.  
813 Acta Crystallogr D Biol Crystallogr. 1998;54(5):905-21.
- 814 33. Zhang Y, Skolnick J. Scoring function for automated assessment of protein structure template  
815 quality. Proteins: Structure, Function, and Bioinformatics. 2004;57(4):702-10.
- 816 34. Kim DE, Chivian D, Baker D. Protein structure prediction and analysis using the Robetta server.  
817 Nucleic Acids Research. 2004 Jul 1;32:W526-W31.
- 818 35. Kelley LA, Mezulis S, Yates CM, Wass MN, Sternberg MJE. The Phyre2 web portal for protein  
819 modeling, prediction and analysis. Nature protocols. 2015 Jun;10(6):845-58.
- 820 36. Källberg M, Wang H, Wang S, Peng J, Wang Z, Lu H, et al. Template-based protein structure  
821 modeling using the RaptorX web server. Nature protocols. 2012;7(8):1511-22.
- 822 37. Biasini M, Bienert S, Waterhouse A, Arnold K, Studer G, Schmidt T, et al. SWISS-MODEL:  
823 modelling protein tertiary and quaternary structure using evolutionary information. Nucleic Acids  
824 Research. 2014 Jul 1;42(W1):W252-W8.
- 825 38. Remmert M, Biegert A, Hauser A, Söding J. HHblits: lightning-fast iterative protein sequence  
826 searching by HMM-HMM alignment. Nature methods. 2012;9(2):173-5.
- 827 39. Xu JR, Zhang Y. How significant is a protein structure similarity with TM-score=0.5?  
828 Bioinformatics. 2010 Apr 1;26(7):889-95.
- 829 40. Wang S, Ma J, Peng J, Xu J. Protein structure alignment beyond spatial proximity. Sci Rep.  
830 [Research Support, N.I.H., Extramural  
831 Research Support, U.S. Gov't, Non-P.H.S.]. 2013;3:1448.
- 832 41. Zalewski JK, Mo JH, Heber S, Heroux A, Gardner RG, Hildebrand JD, et al. Structure of the  
833 Shroom-Rho kinase complex reveals a binding interface with monomeric Shroom that regulates cell  
834 morphology and stimulates kinase activity. J Biol Chem. 2016 Oct 10.
- 835 42. Mohan S, Rizaldy R, Das D, Bauer RJ, Heroux A, Trakselis MA, et al. Structure of Shroom  
836 domain 2 reveals a three-segmented coiled-coil required for dimerization, Rock binding, and apical  
837 constriction. Mol Biol Cell. [Research Support, N.I.H., Extramural Research Support, U.S. Gov't,  
838 Non-P.H.S.]. 2012 Jun;23(11):2131-42.
- 839 43. Ioffe S, Szegedy C, editors. Batch Normalization: Accelerating Deep Network Training by  
840 Reducing Internal Covariate Shift. Proceedings of The 32nd International Conference on Machine  
841 Learning; 2015.
- 842 44. Wang S, Peng J, Ma J, Xu J. Protein secondary structure prediction using deep convolutional  
843 neural fields. Sci Rep. 2016;6.
- 844 45. Miyazawa S, Jernigan RL. Estimation of effective interresidue contact energies from protein  
845 crystal structures: quasi-chemical approximation. Macromolecules. 1985;18(3):534-52.
- 846 46. Betancourt MR, Thirumalai D. Pair potentials for protein folding: choice of reference states and  
847 sensitivity of predicted native states to variations in the interaction schemes. Protein Science.  
848 1999;8(02):361-9.
- 849 47. Bergstra J, Breuleux O, Bastien F, Lamblin P, Pascanu R, Desjardins G, et al., editors. Theano: A  
850 CPU and GPU math compiler in Python. Proc 9th Python in Science Conf; 2010.
- 851 48. Drozdetskiy A, Cole C, Procter J, Barton GJ. JPred4: a protein secondary structure prediction  
852 server. Nucleic acids research. 2015:gkv332.
- 853 49. Wang S, Li W, Liu S, Xu J. RaptorX-Property: a web server for protein structure property  
854 prediction. Nucleic acids research. 2016:gkw306.
